# Supplementary material for: Synthetic Opals or Versatile Nanotools—A One-Step Synthesis of Uniform Spherical Silica Particles
Source: MDPI journal article supplement (doi:10.3390/ijms241813693), 2023-09-05
Supplement: s1 [file s1]

A dark blue outline of a house, consisting of a triangular roof and a rectangular base. The letters 'MDPI' are centered within the house shape.

**MDPI**
