# Supplementary figures and images for: Synthetic Opals or Versatile Nanotools—A One-Step Synthesis of Uniform Spherical Silica Particles
Source: MDPI journal article supplement (doi:10.3390/ijms241813693), 2023-09-05

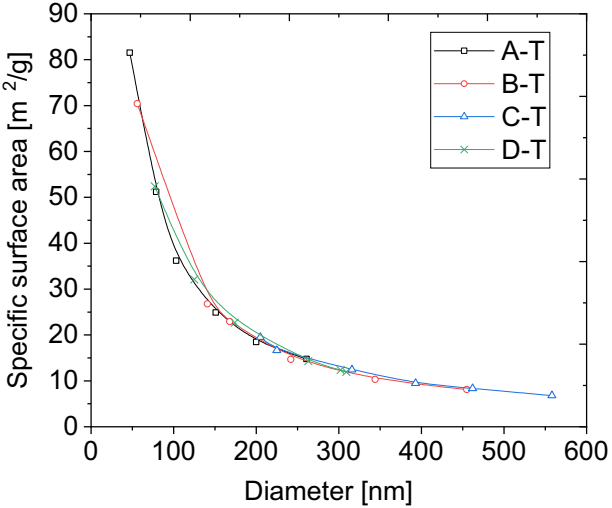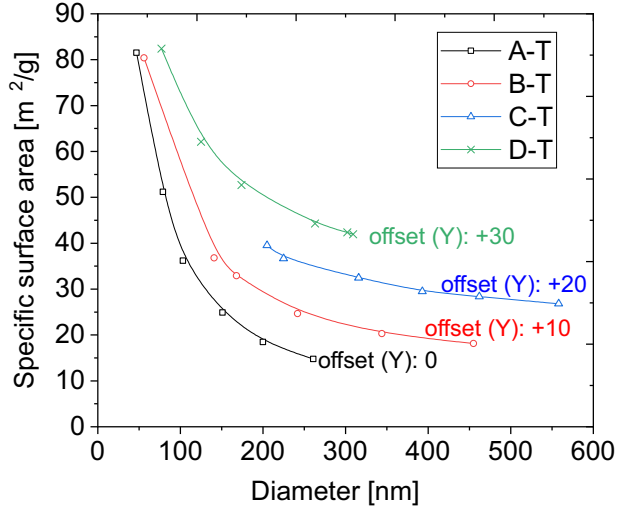

Supplement: s1 [file s1]

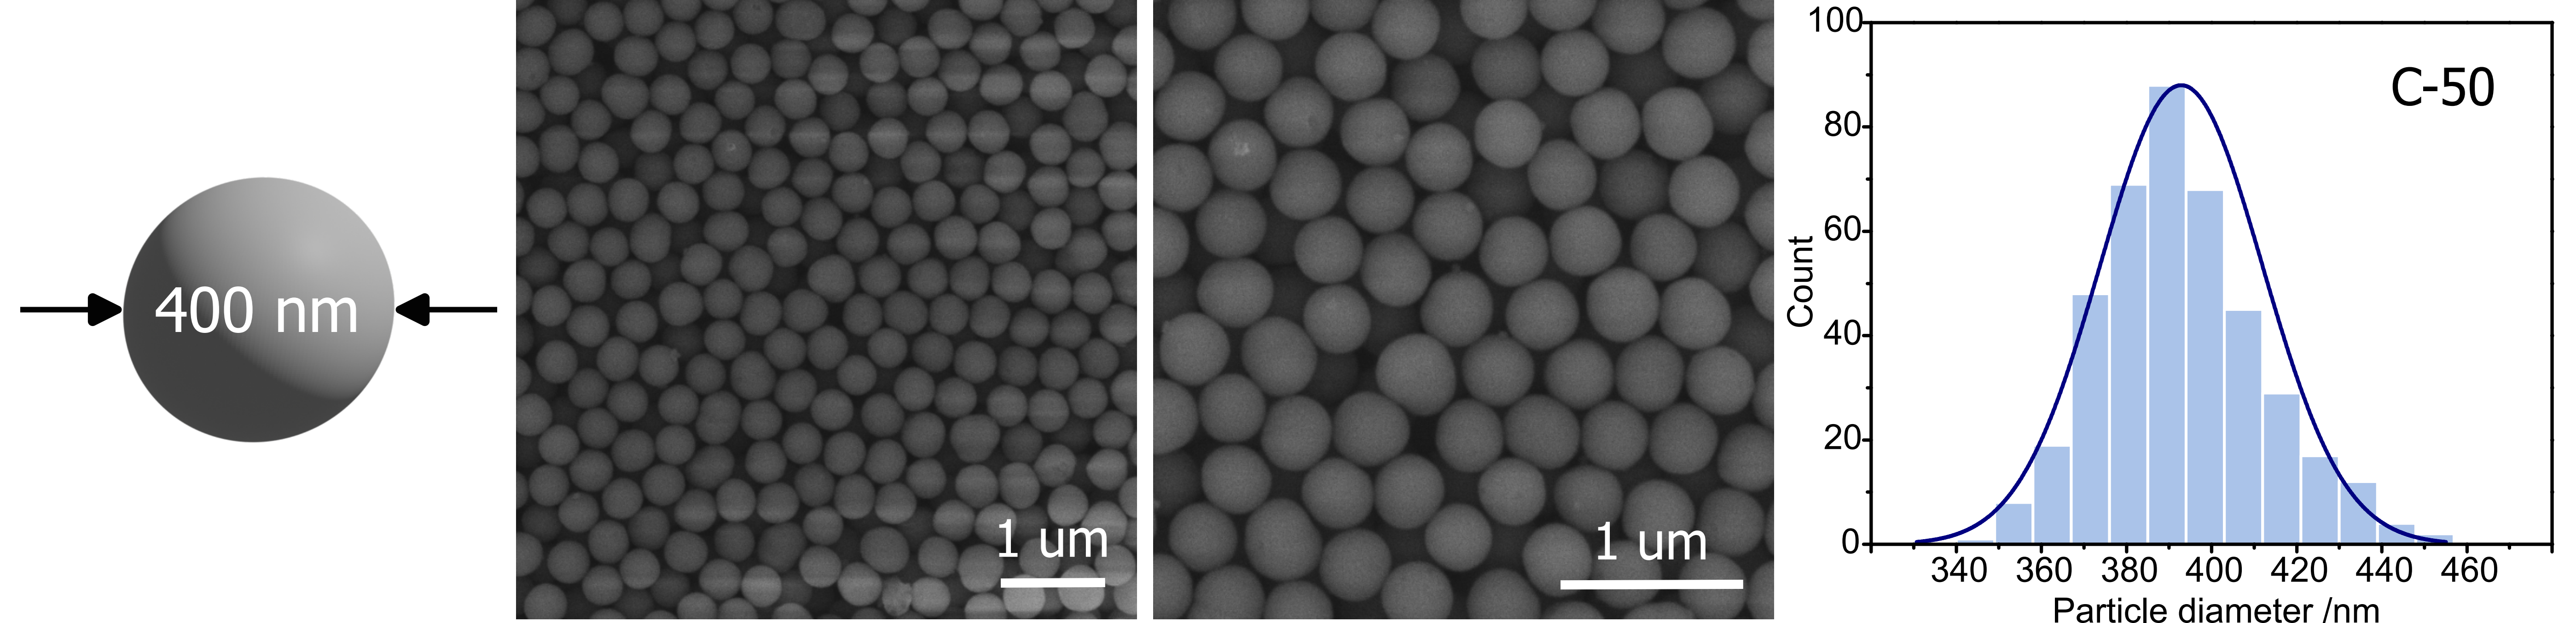

Supplement: s1 [file s1]

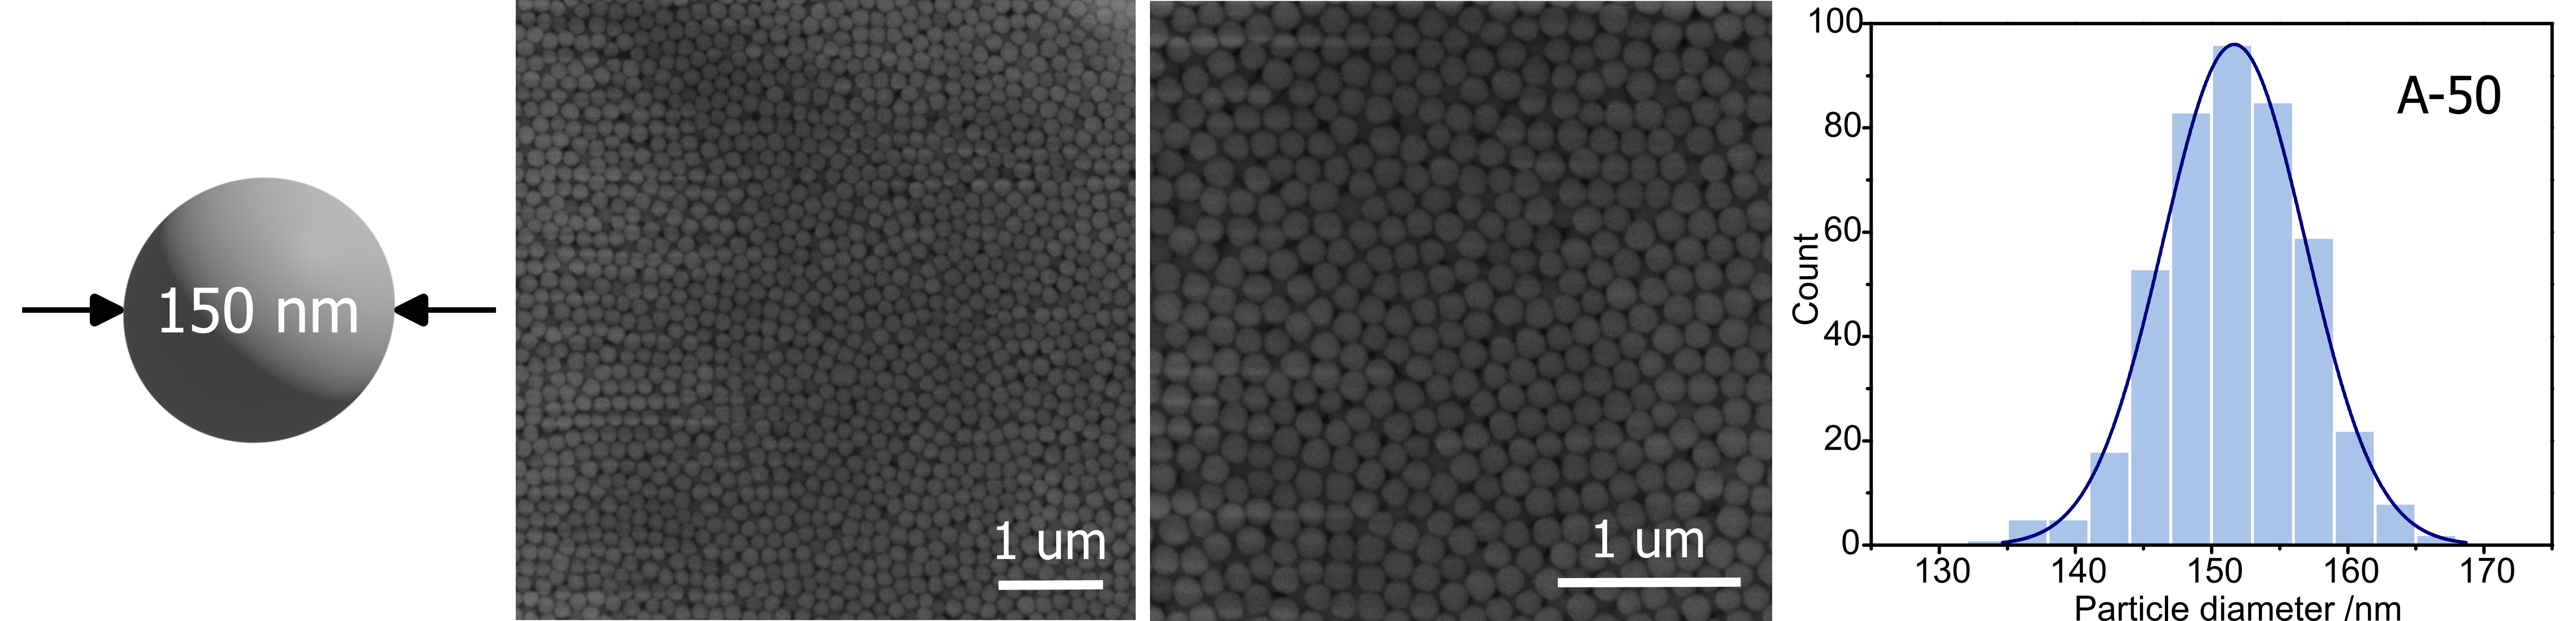

Supplement: s1 [file s1]

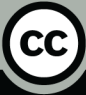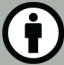

BY

Supplement: s1 [file s1]

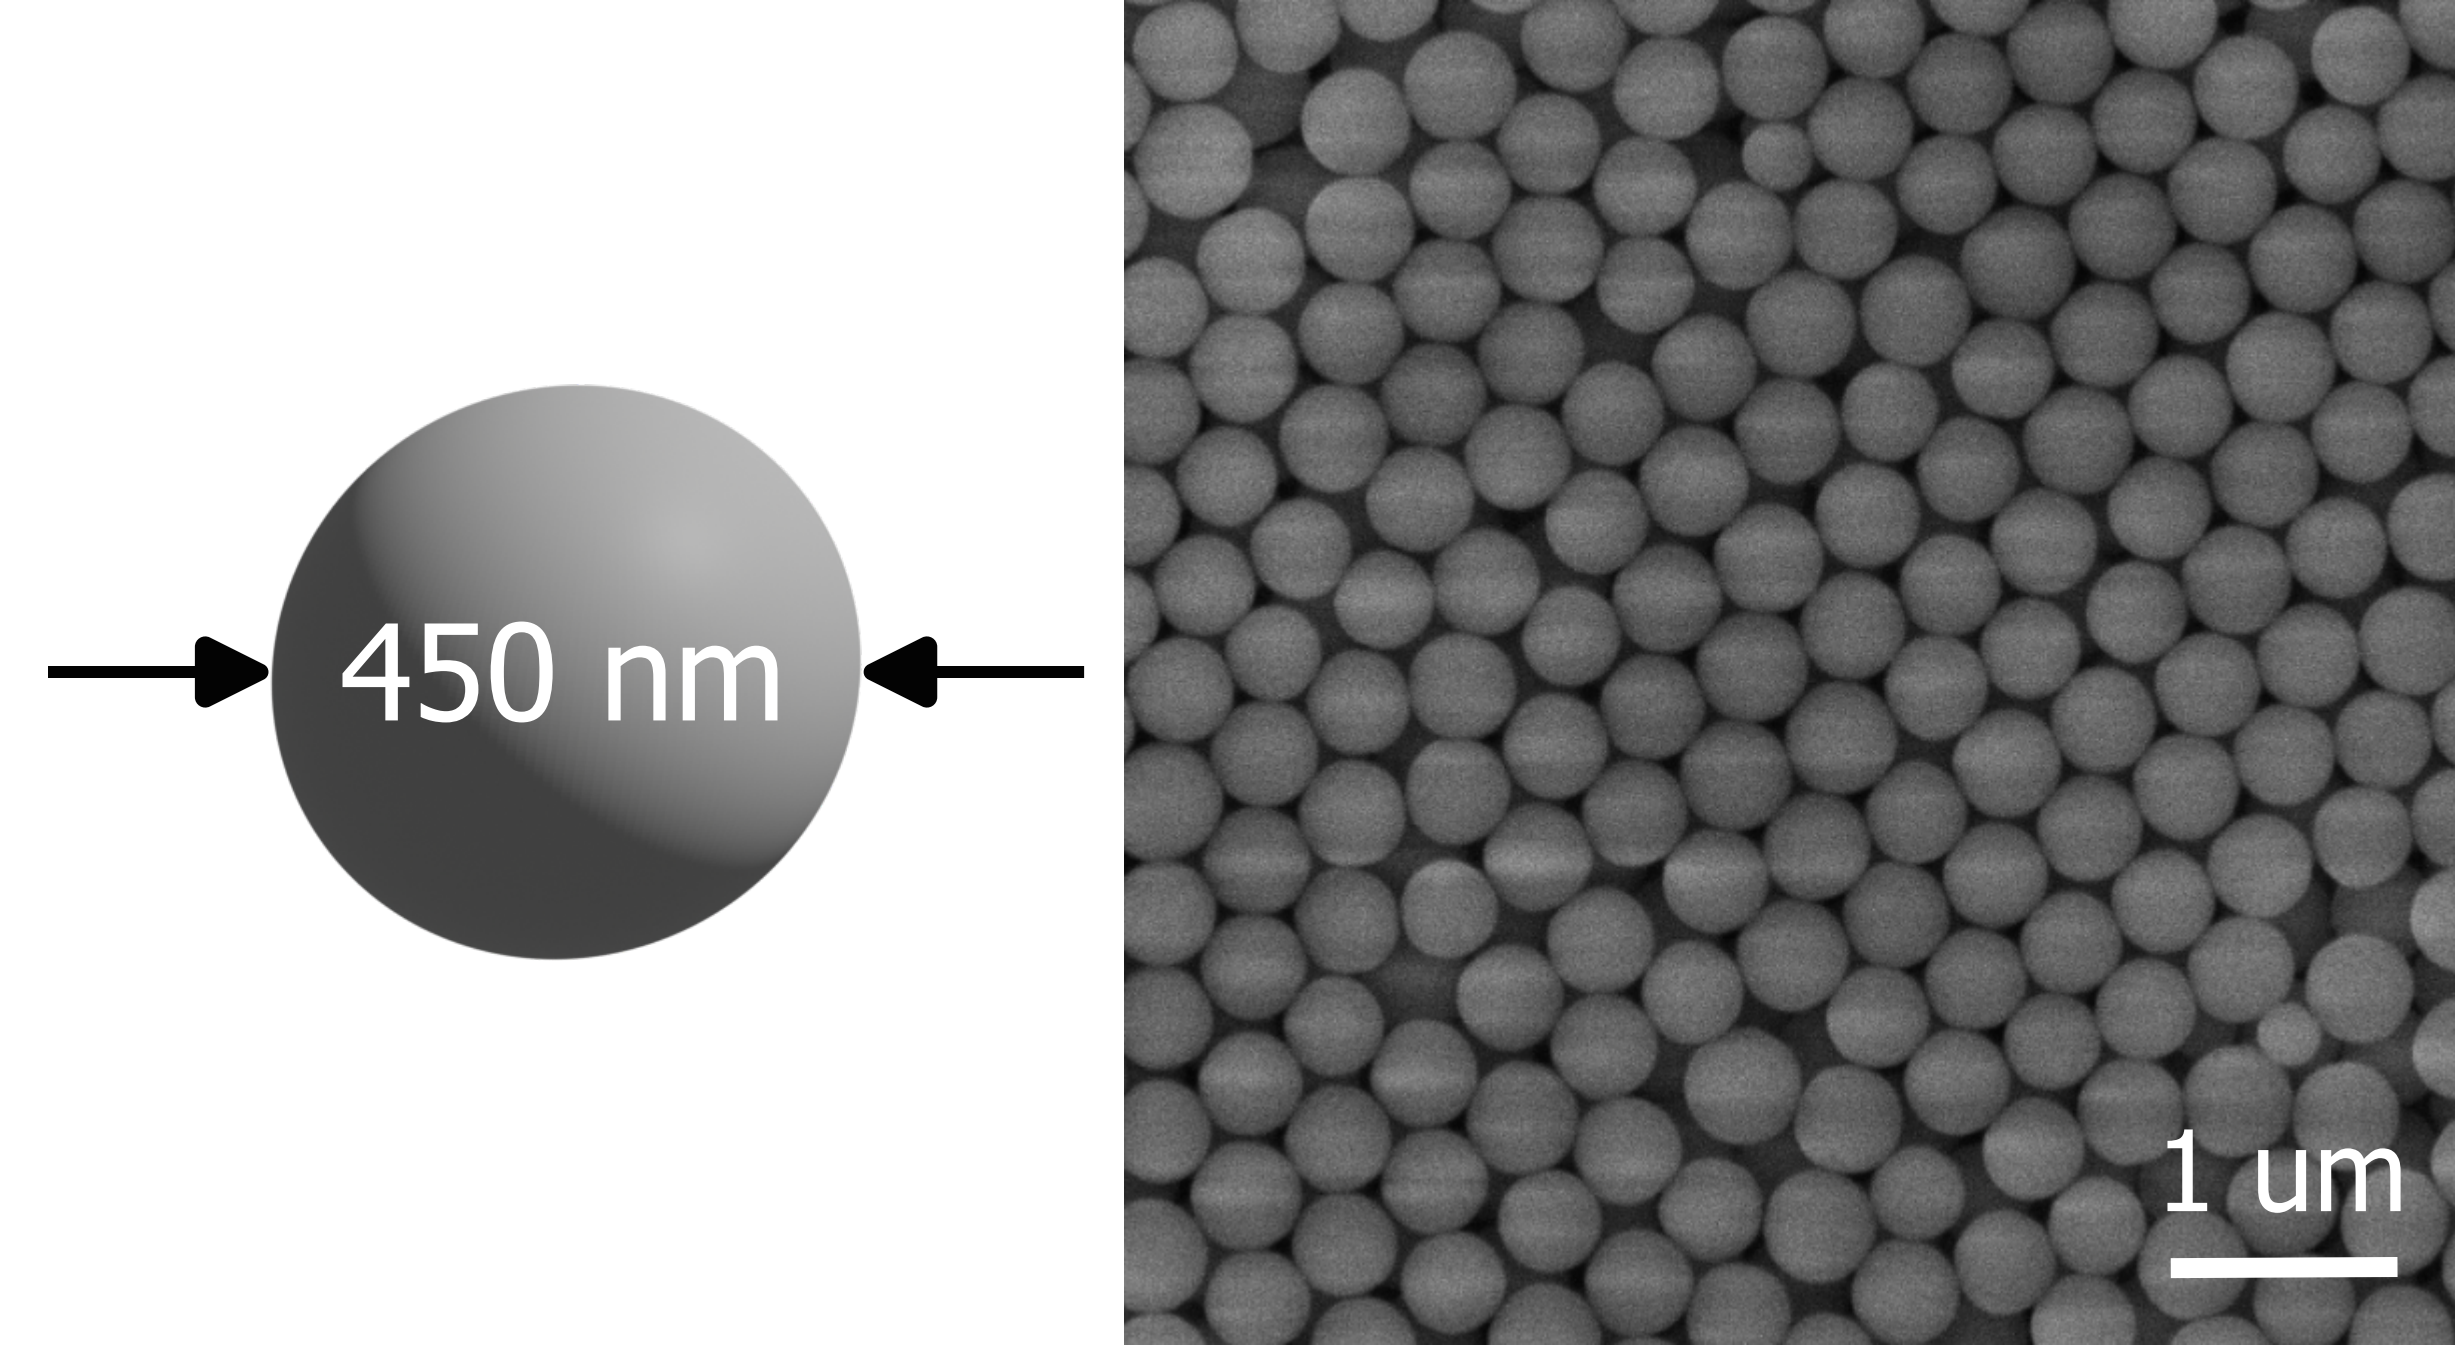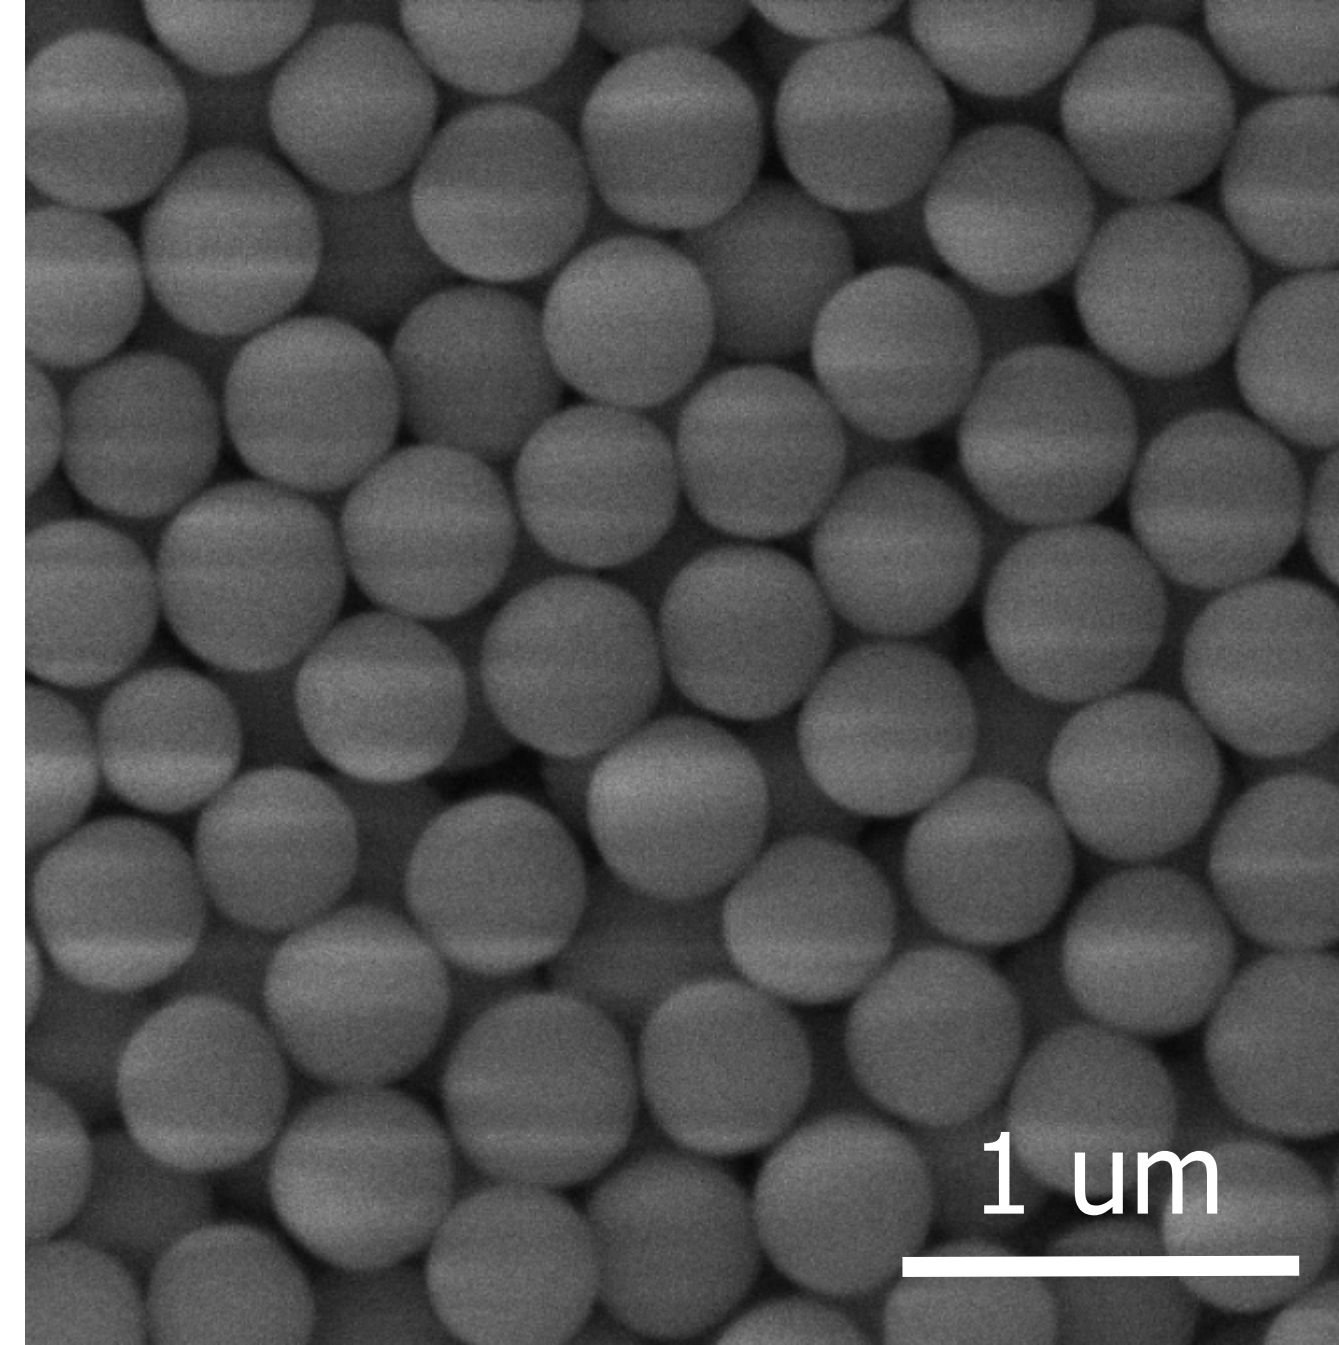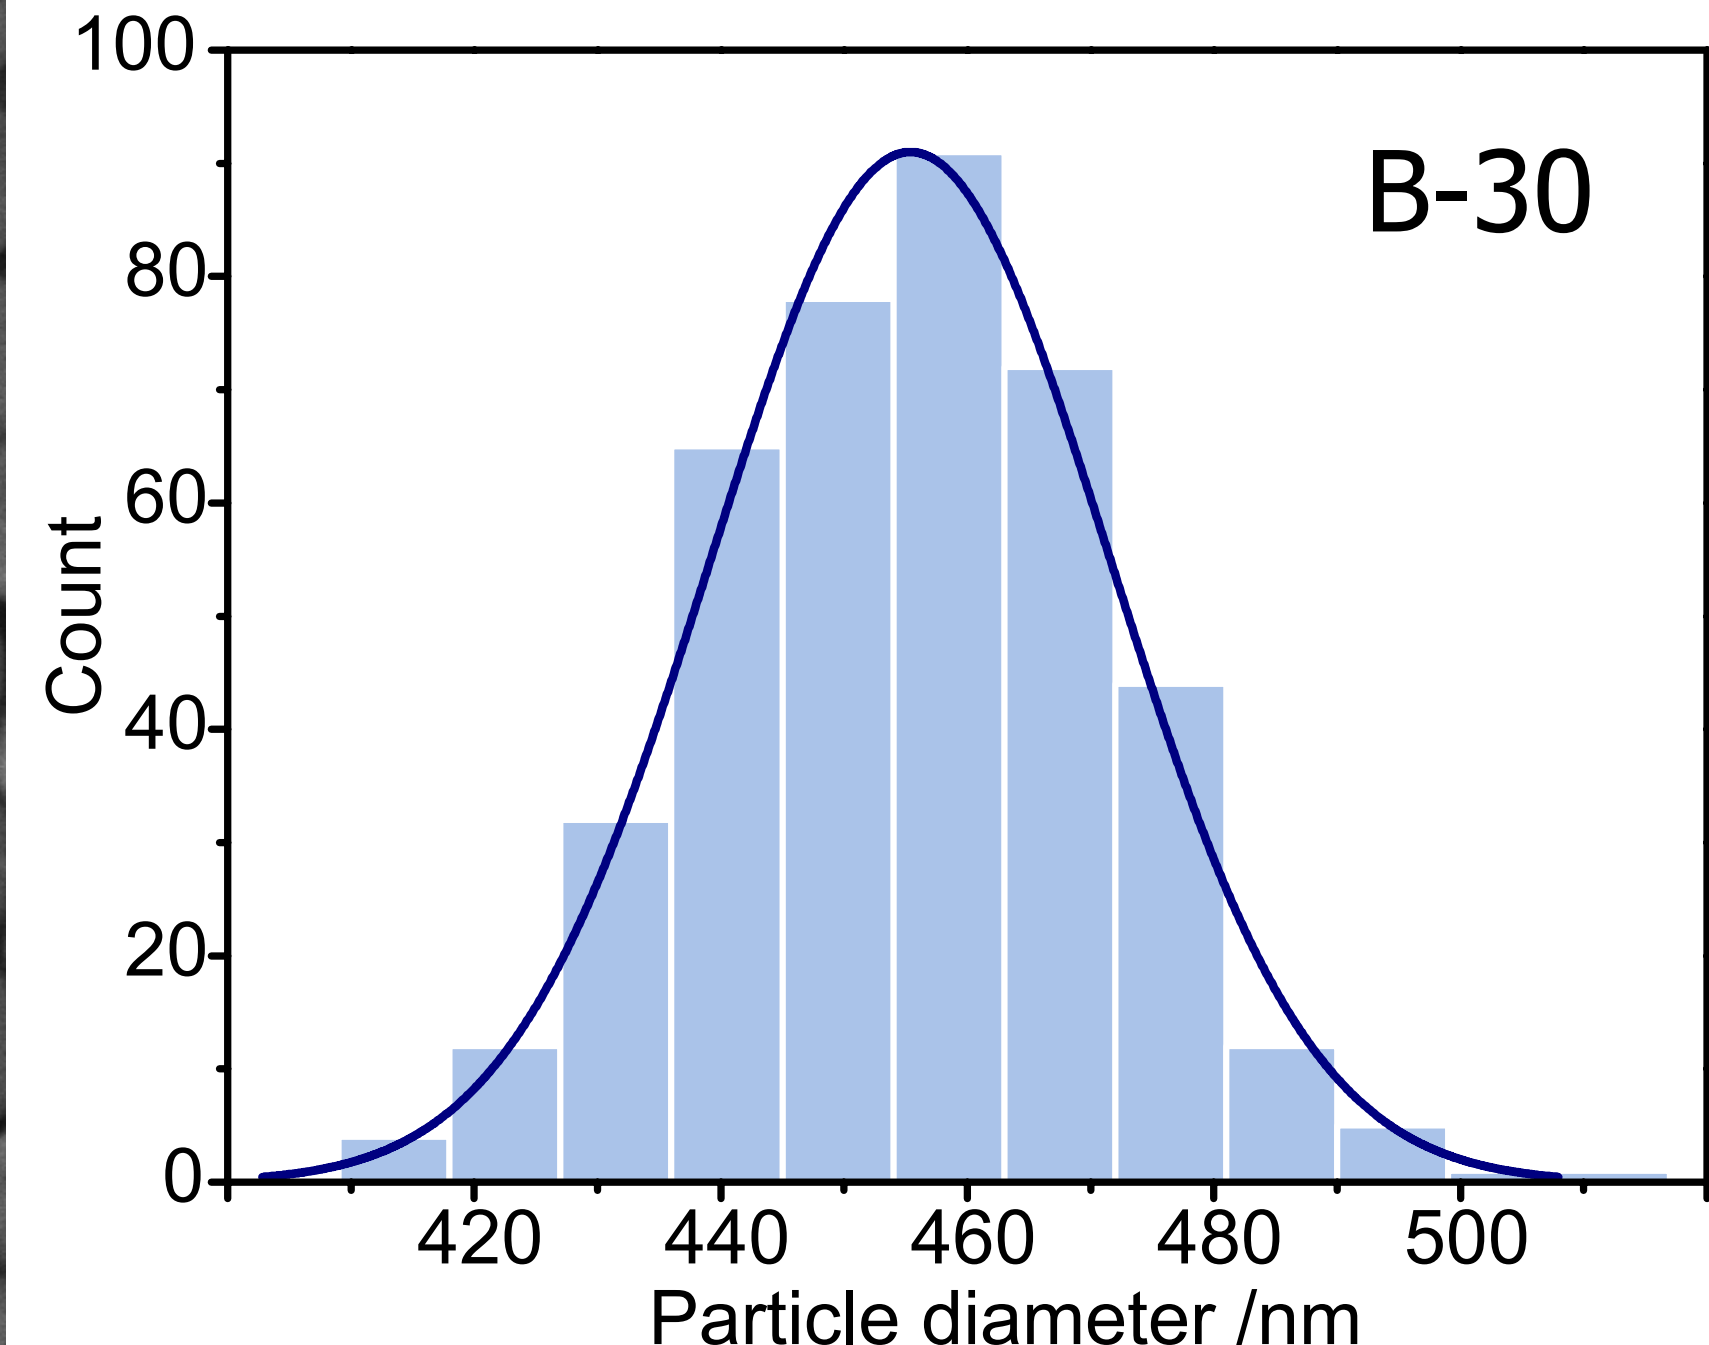

Supplement: s1 [file s1]

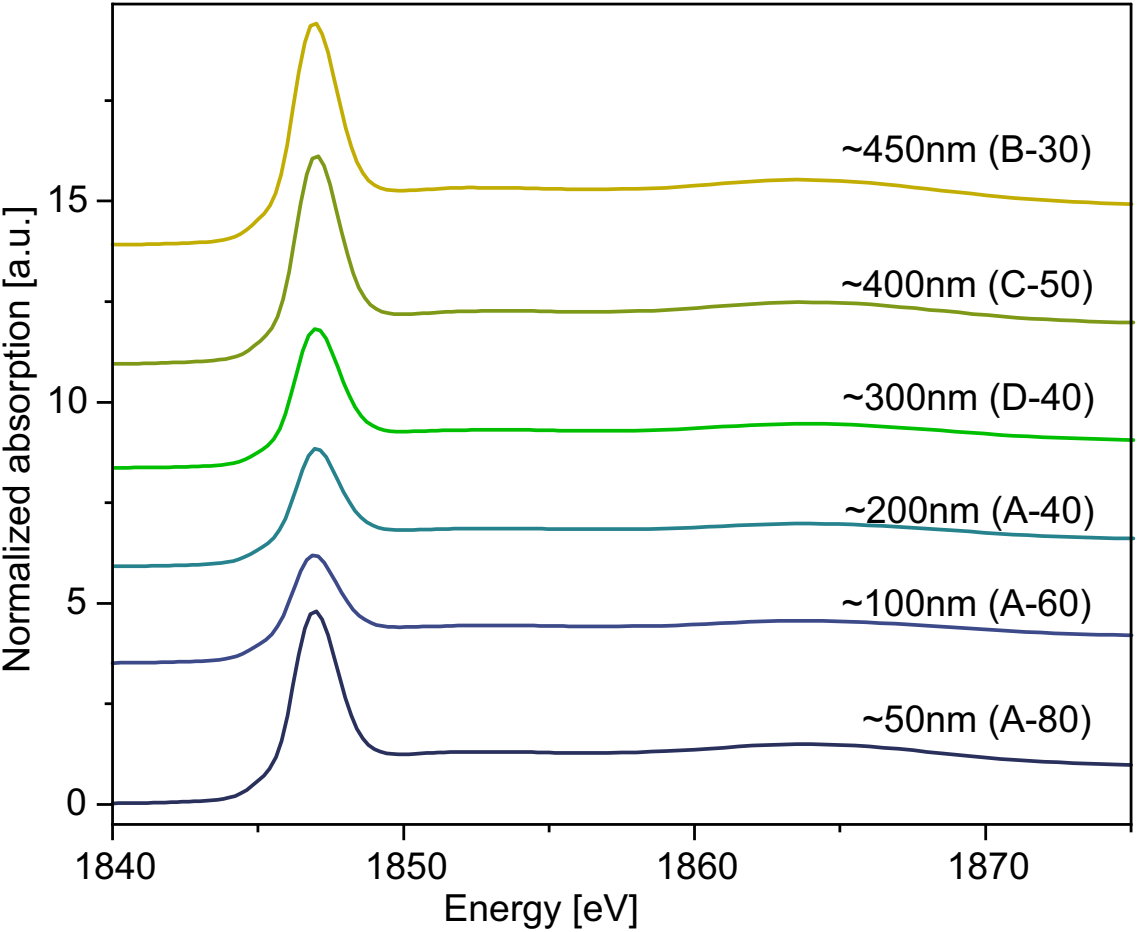

Supplement: s1 [file s1]

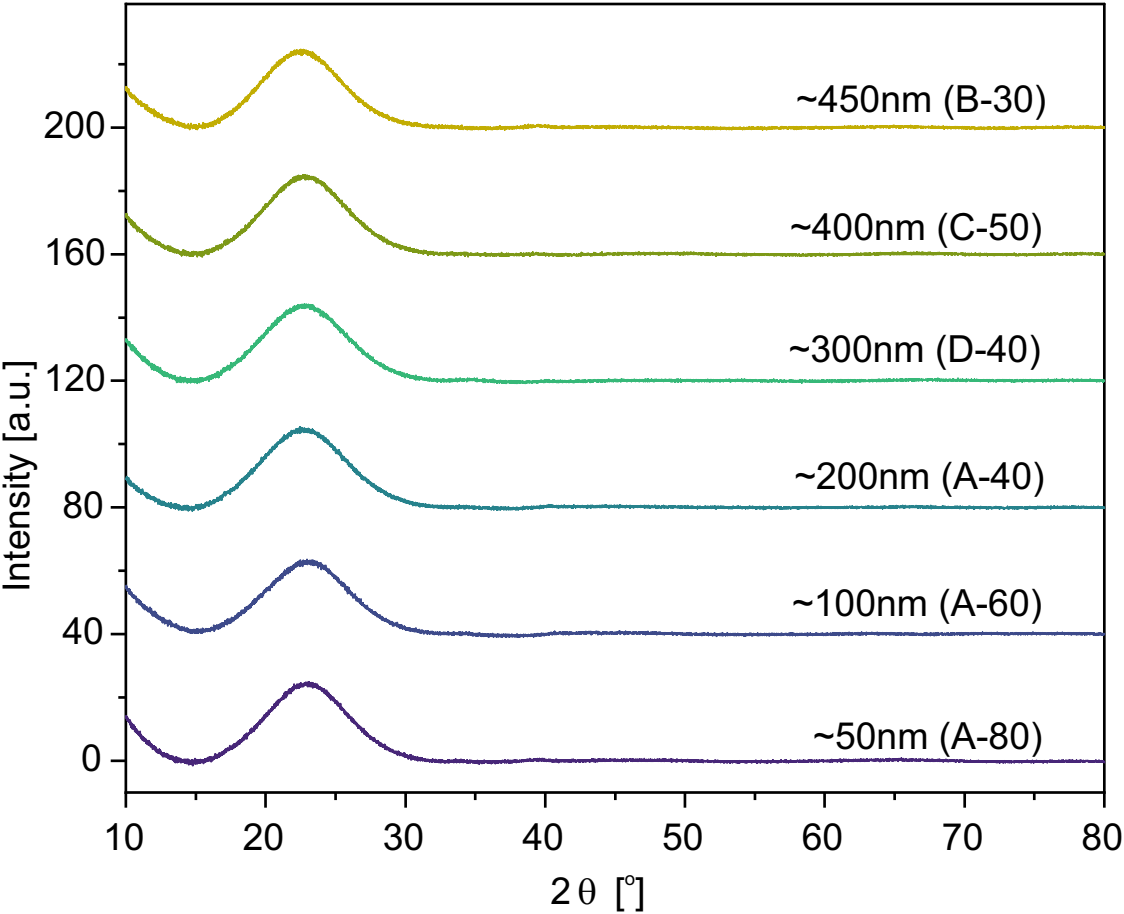

Supplement: s1 [file s1]

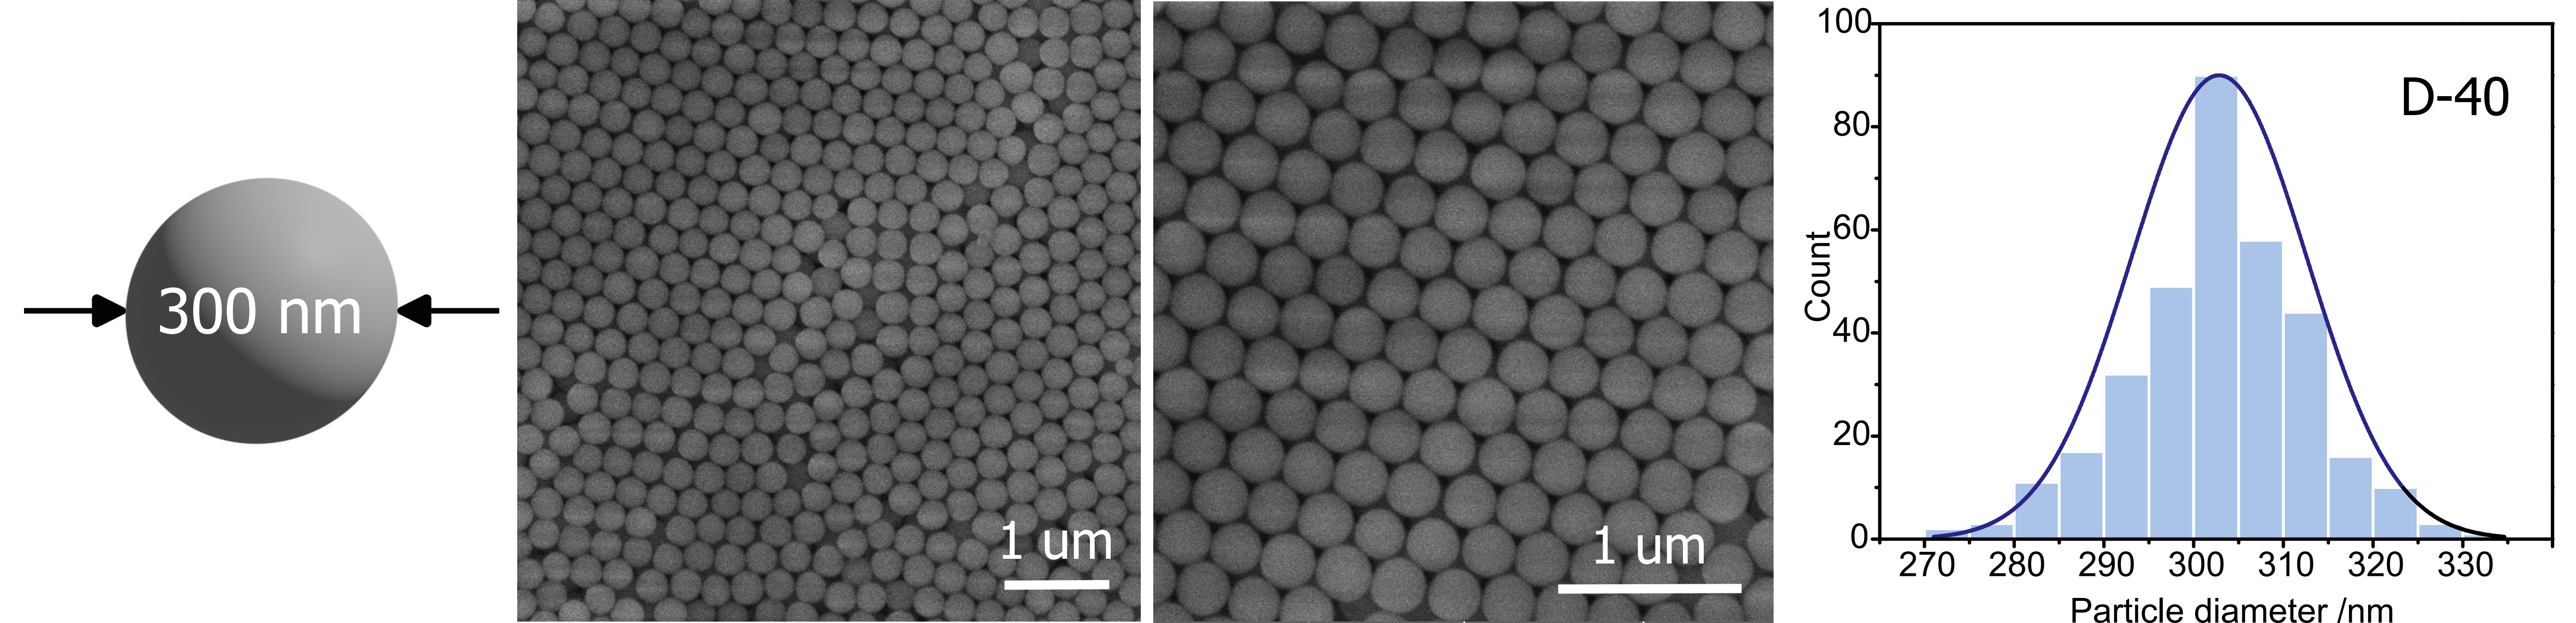

Supplement: s1 [file s1]

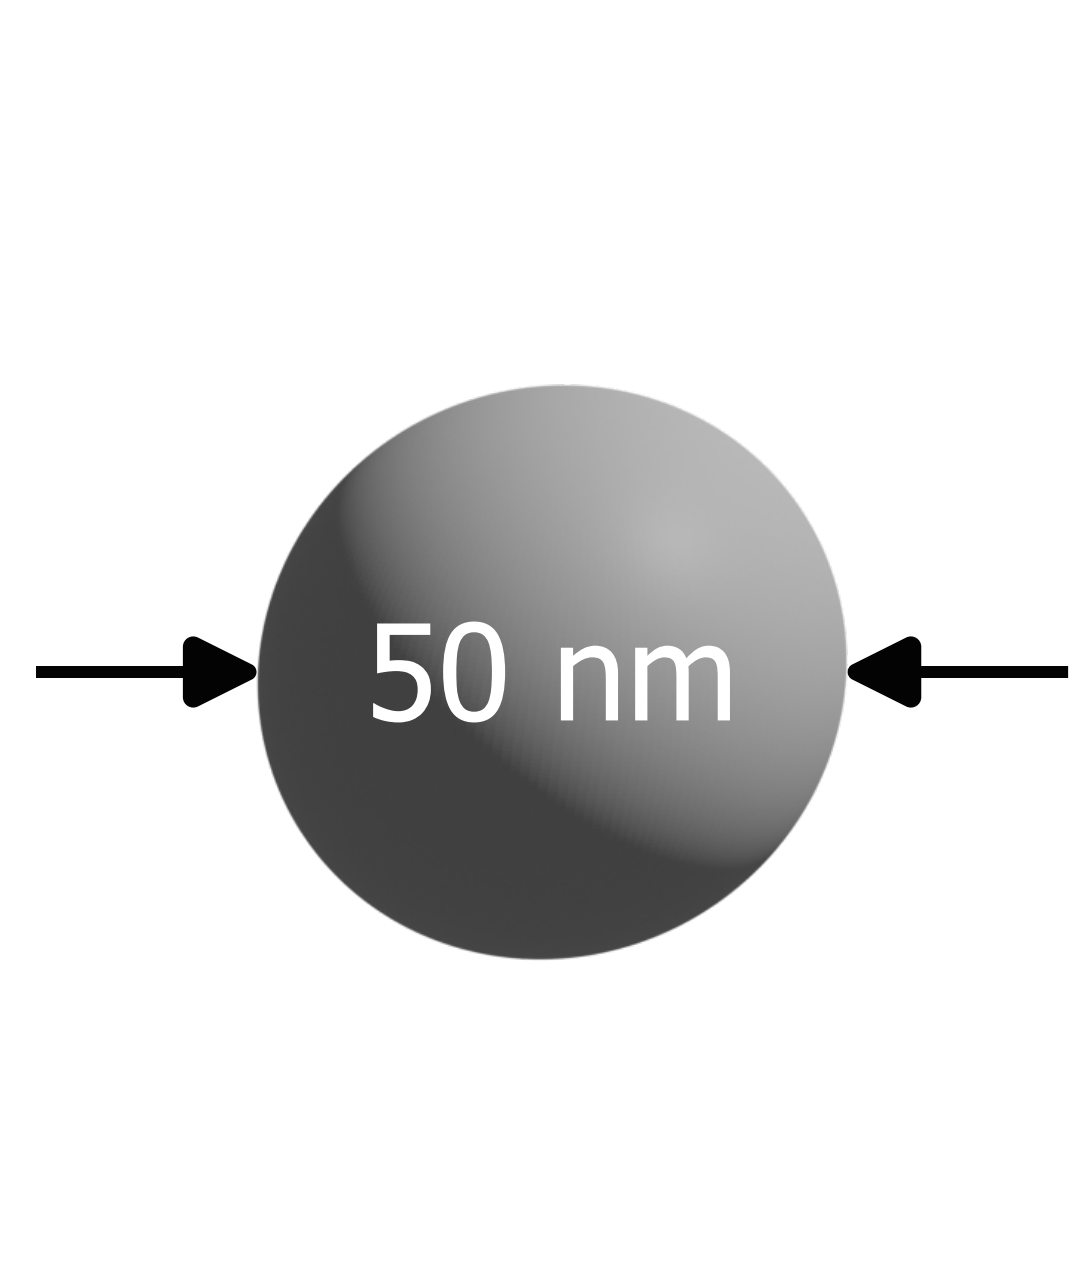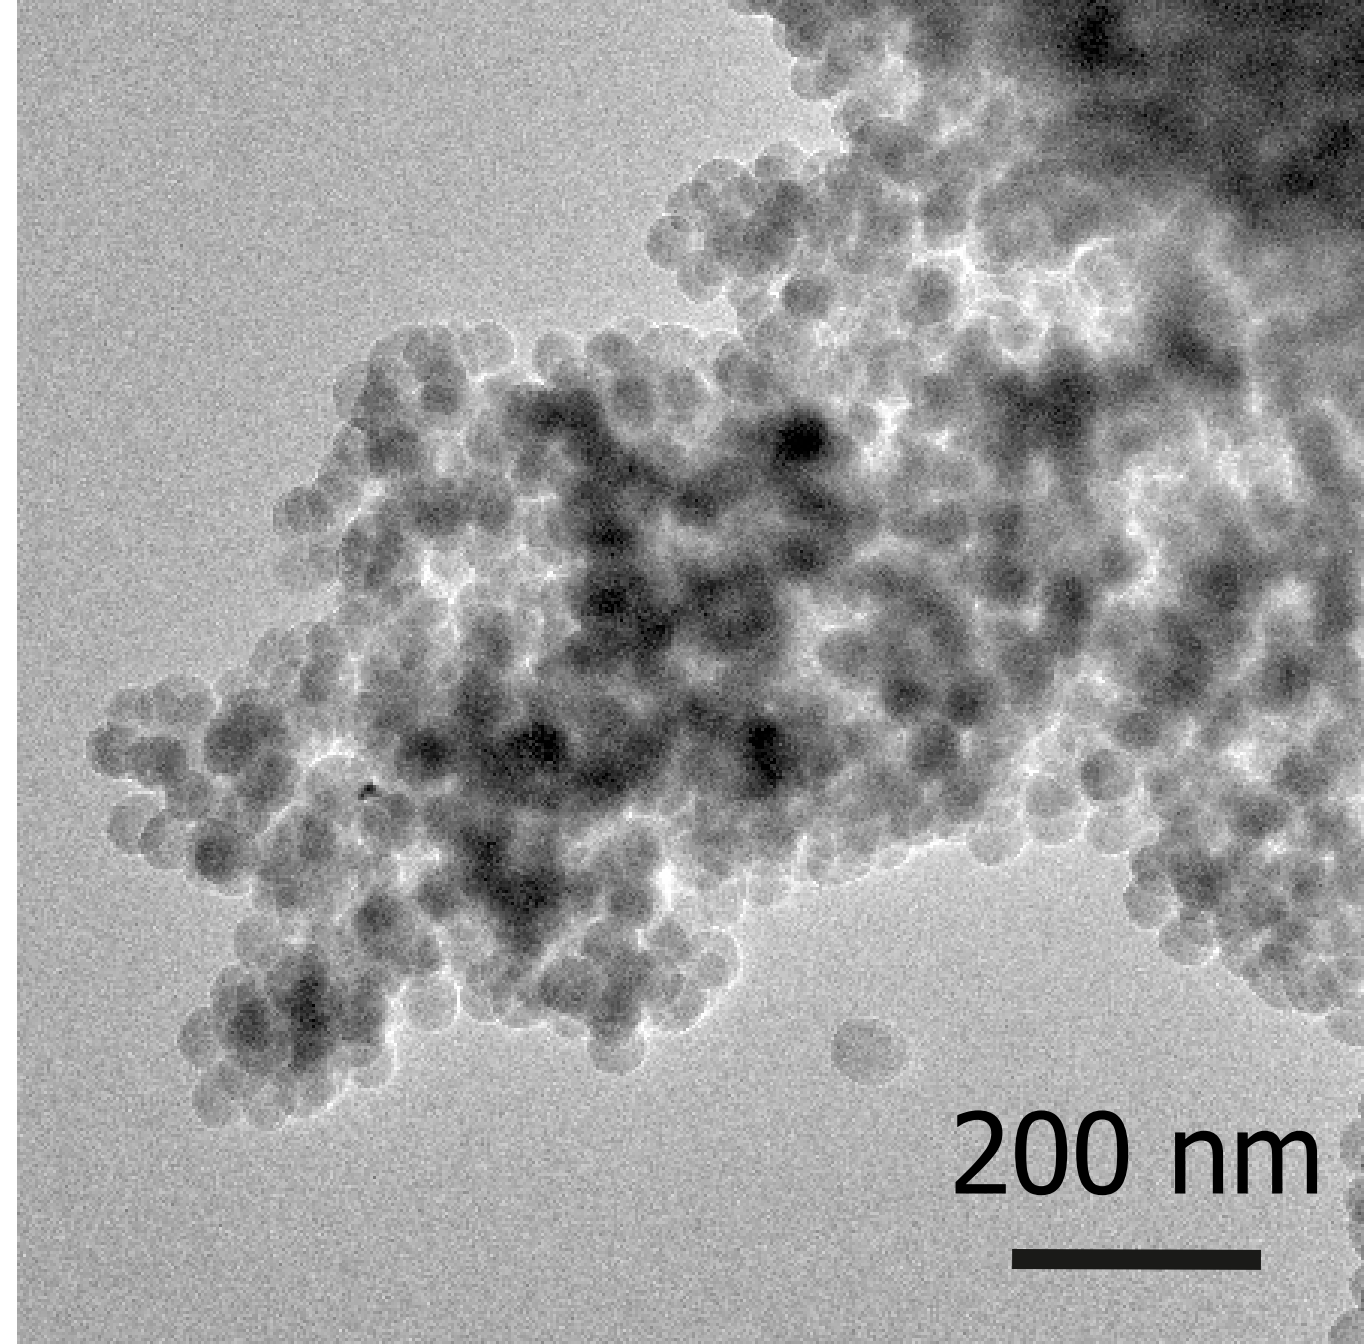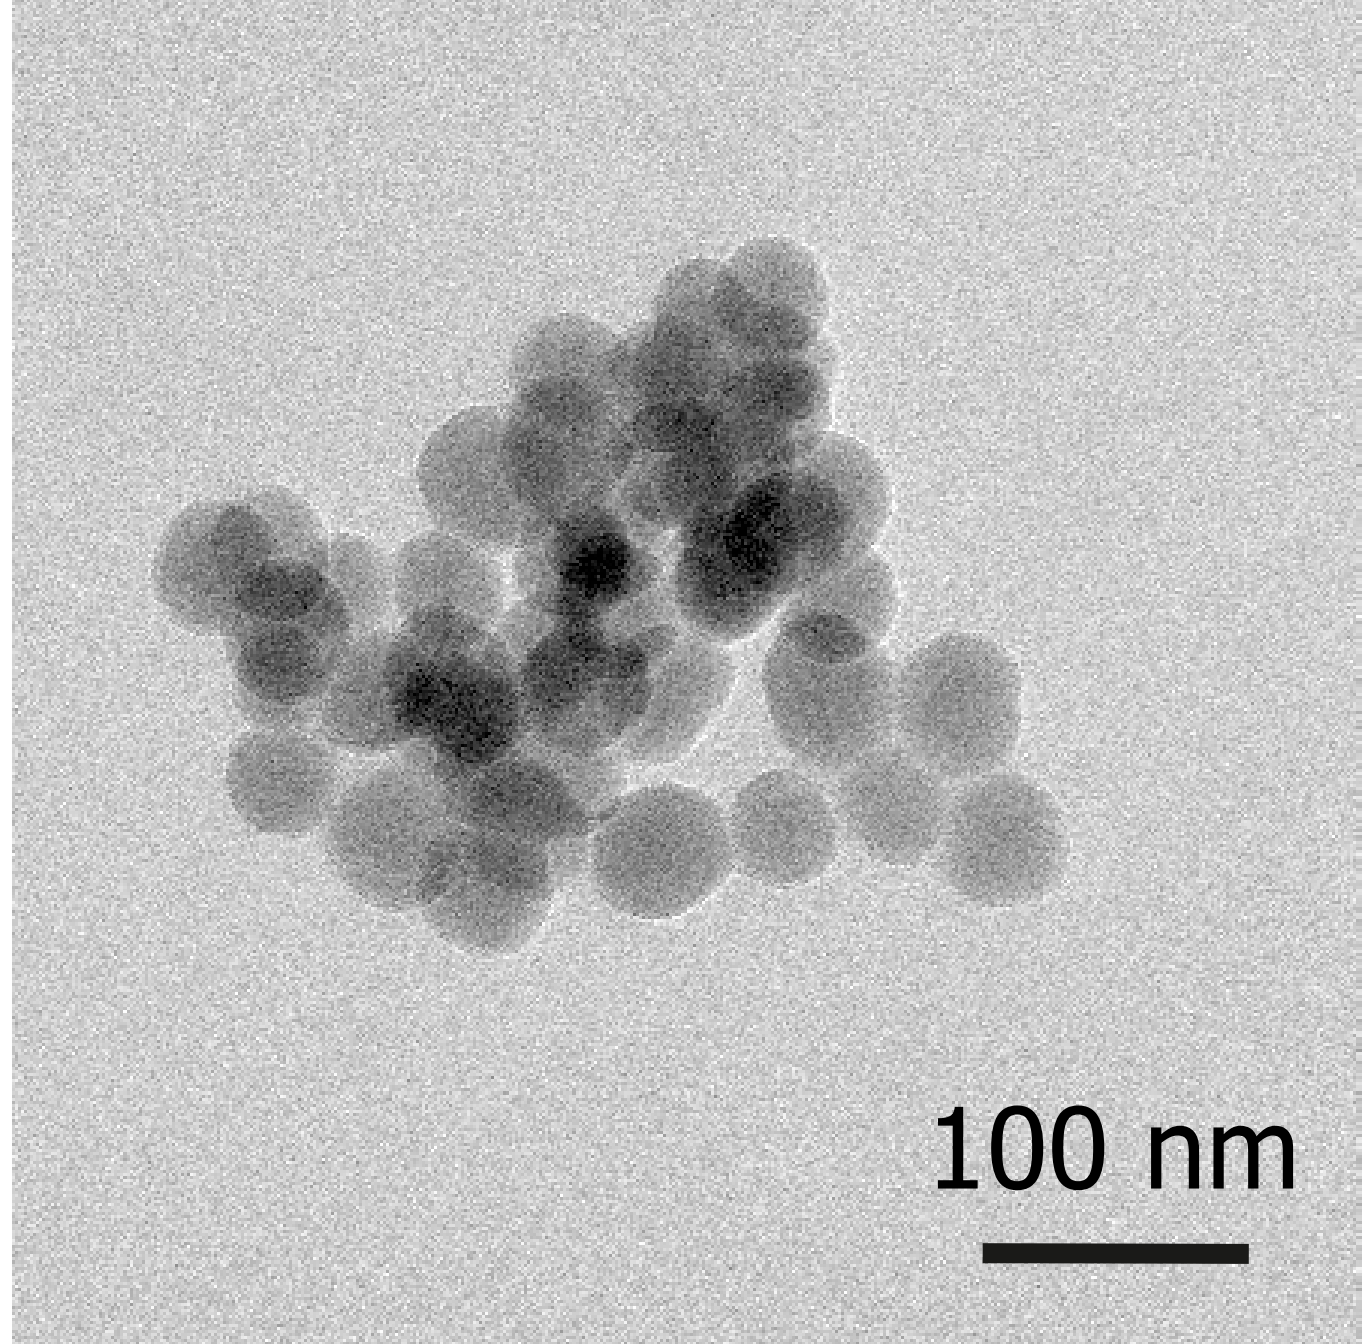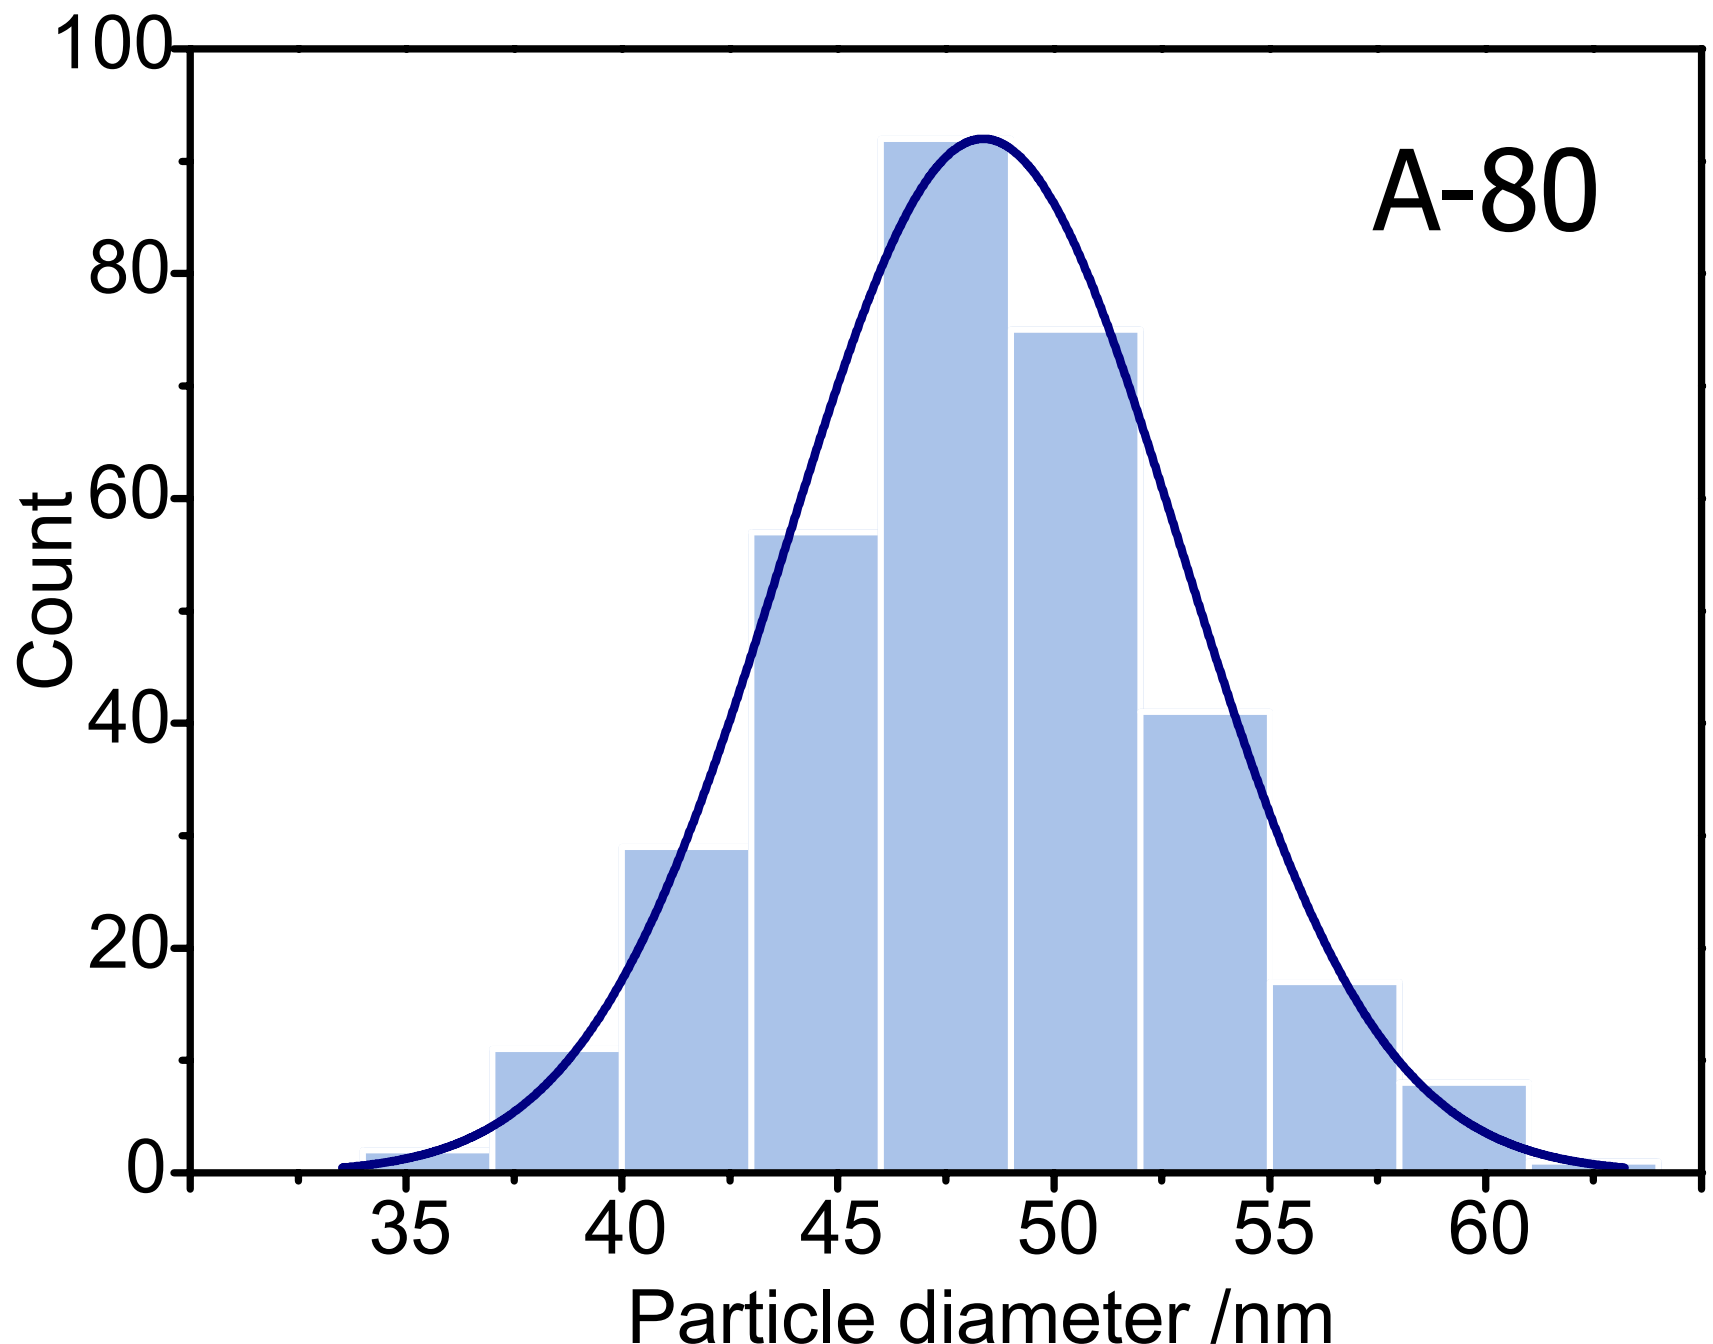

Supplement: s1 [file s1]

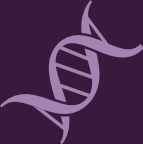

# International Journal of *Molecular Sciences*

Supplement: s1 [file s1]

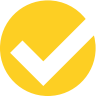

check for  
updates

Supplement: s1 [file s1]

layer  
of secondary  
particles

solid  
core

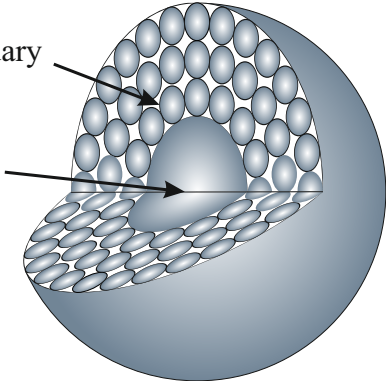

Supplement: s1 [file s1]

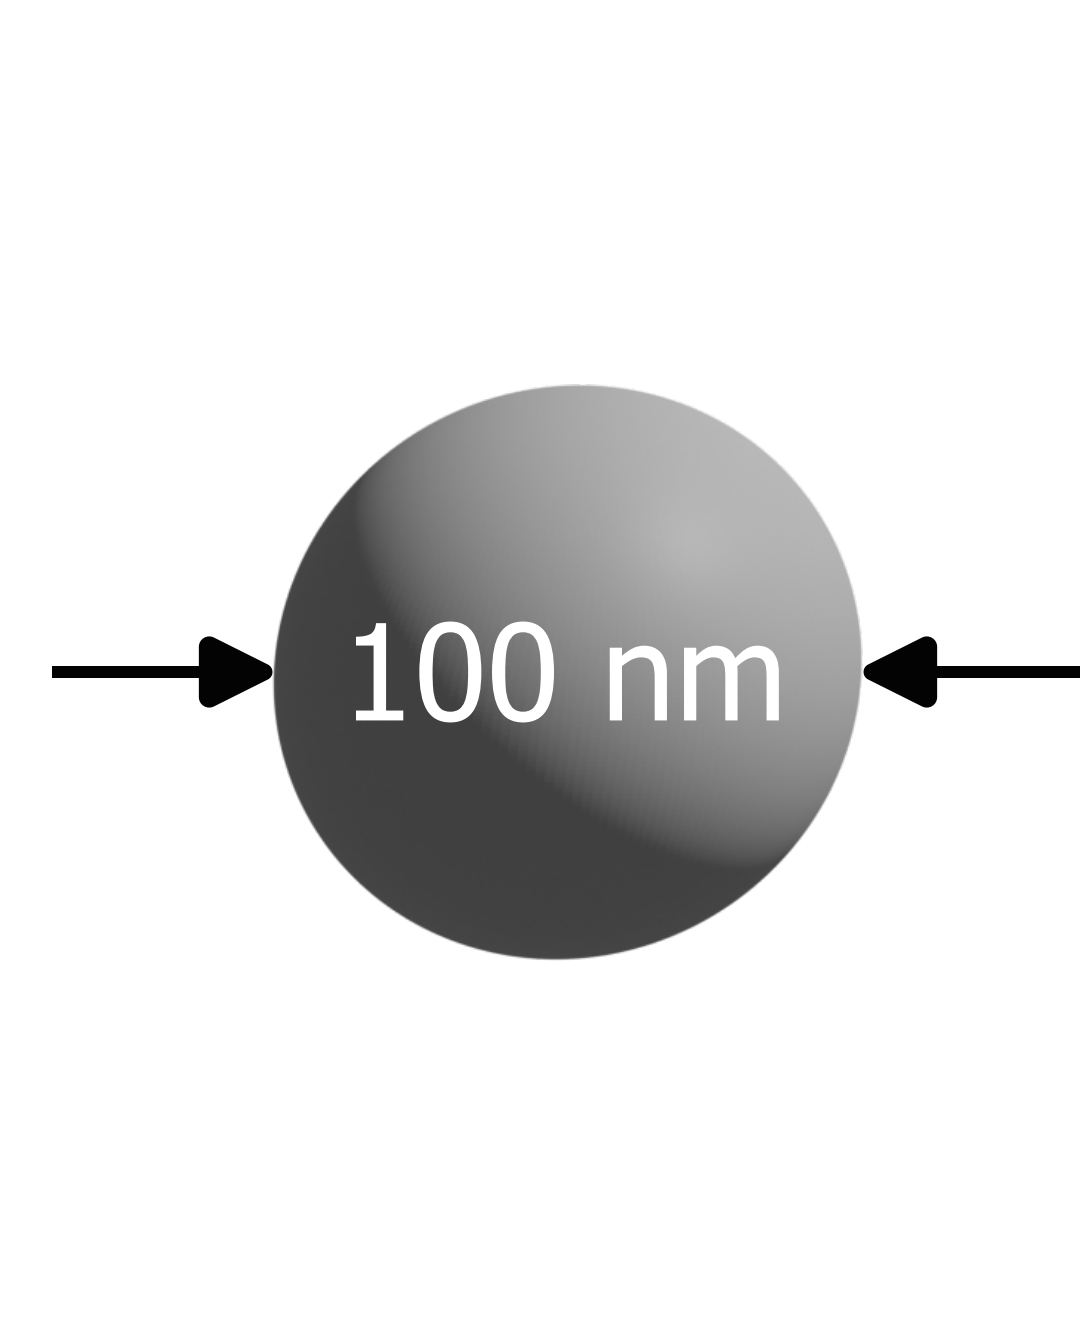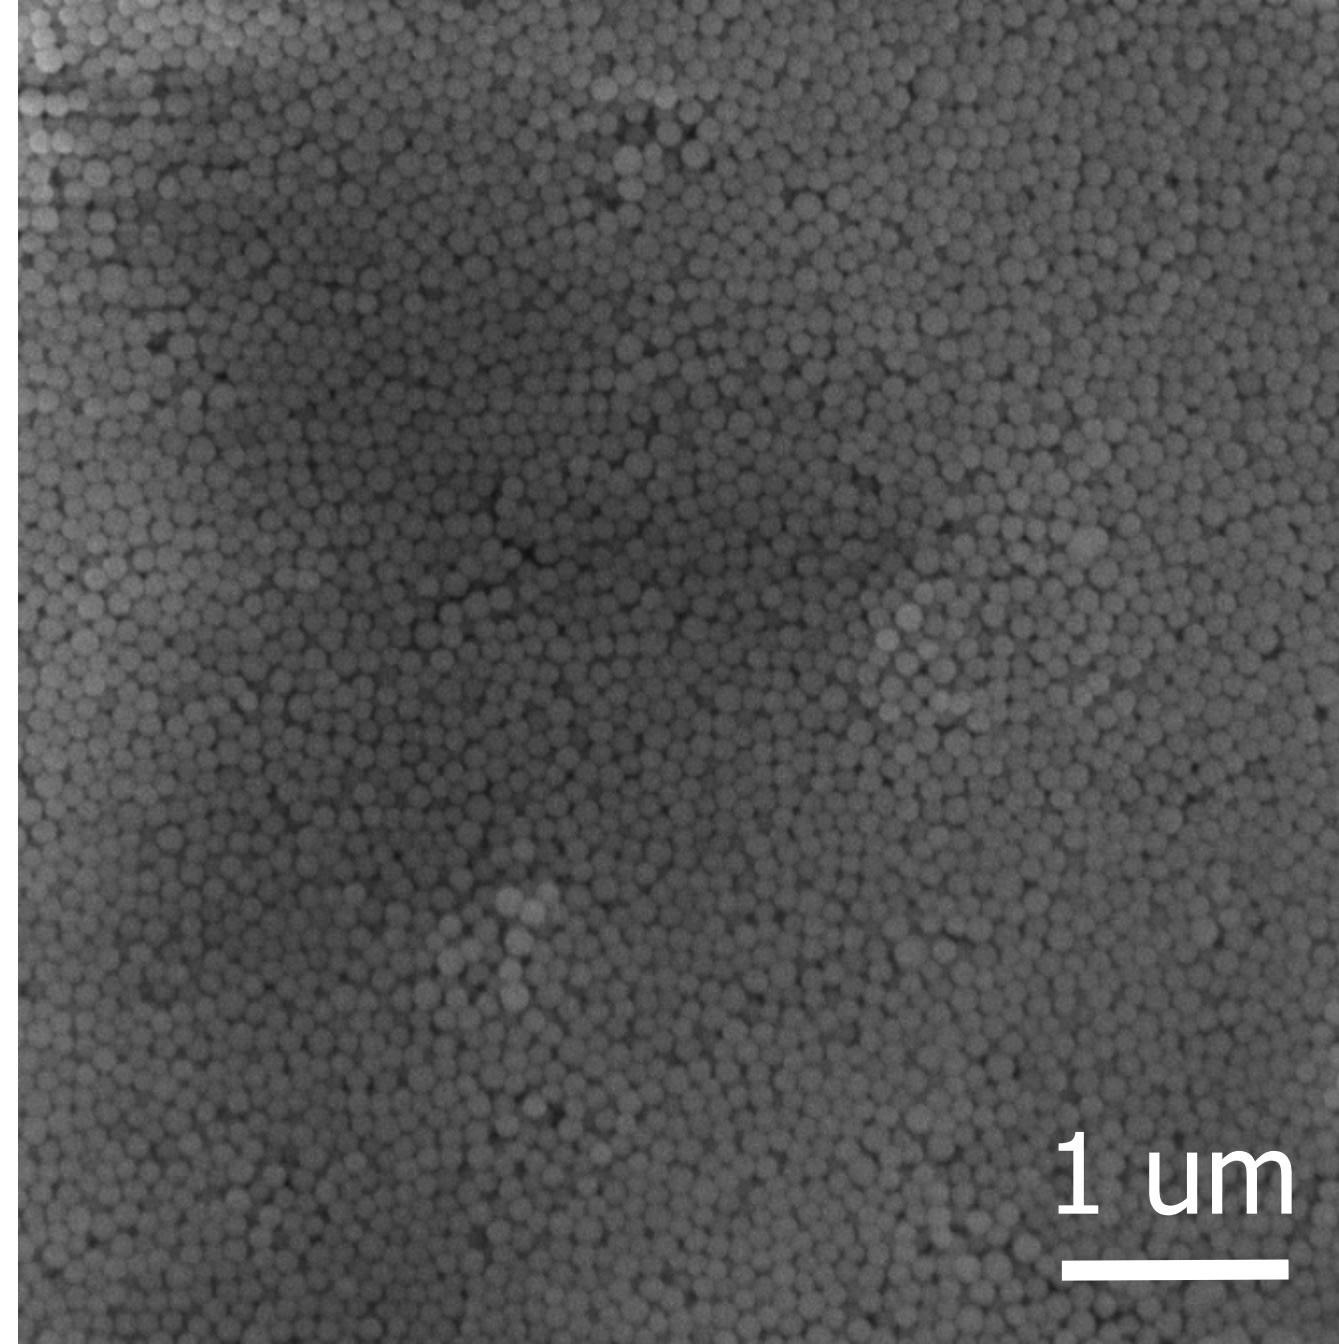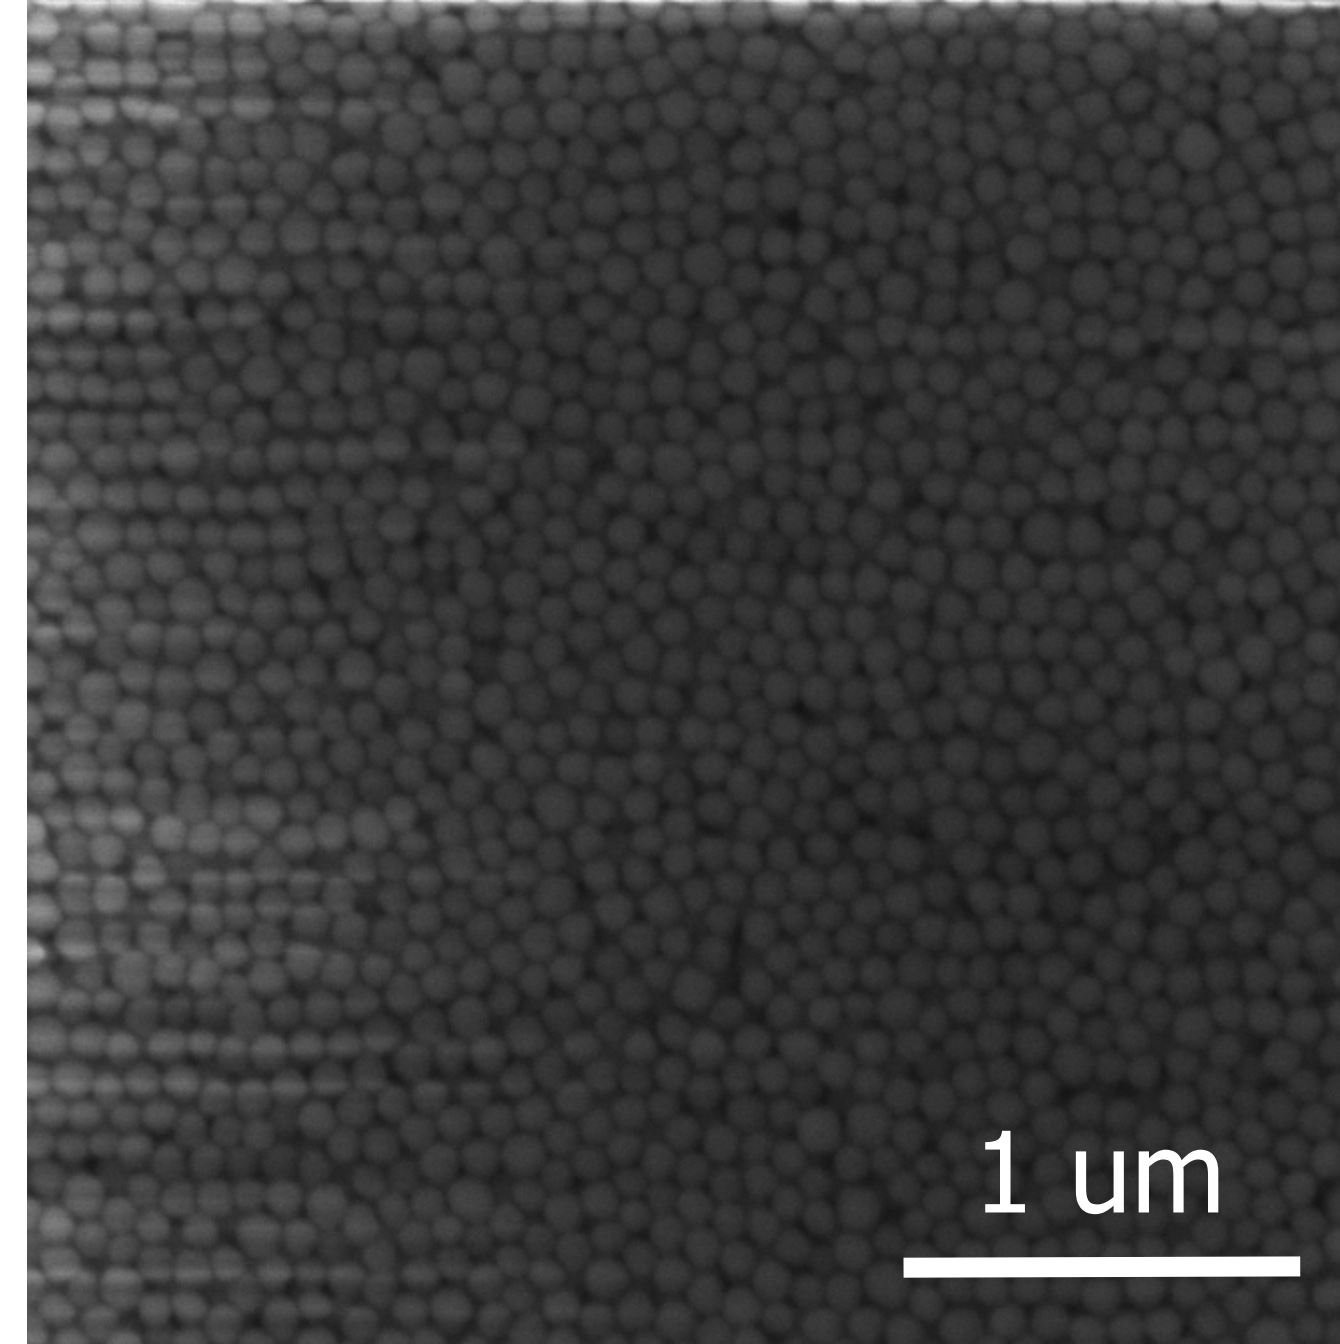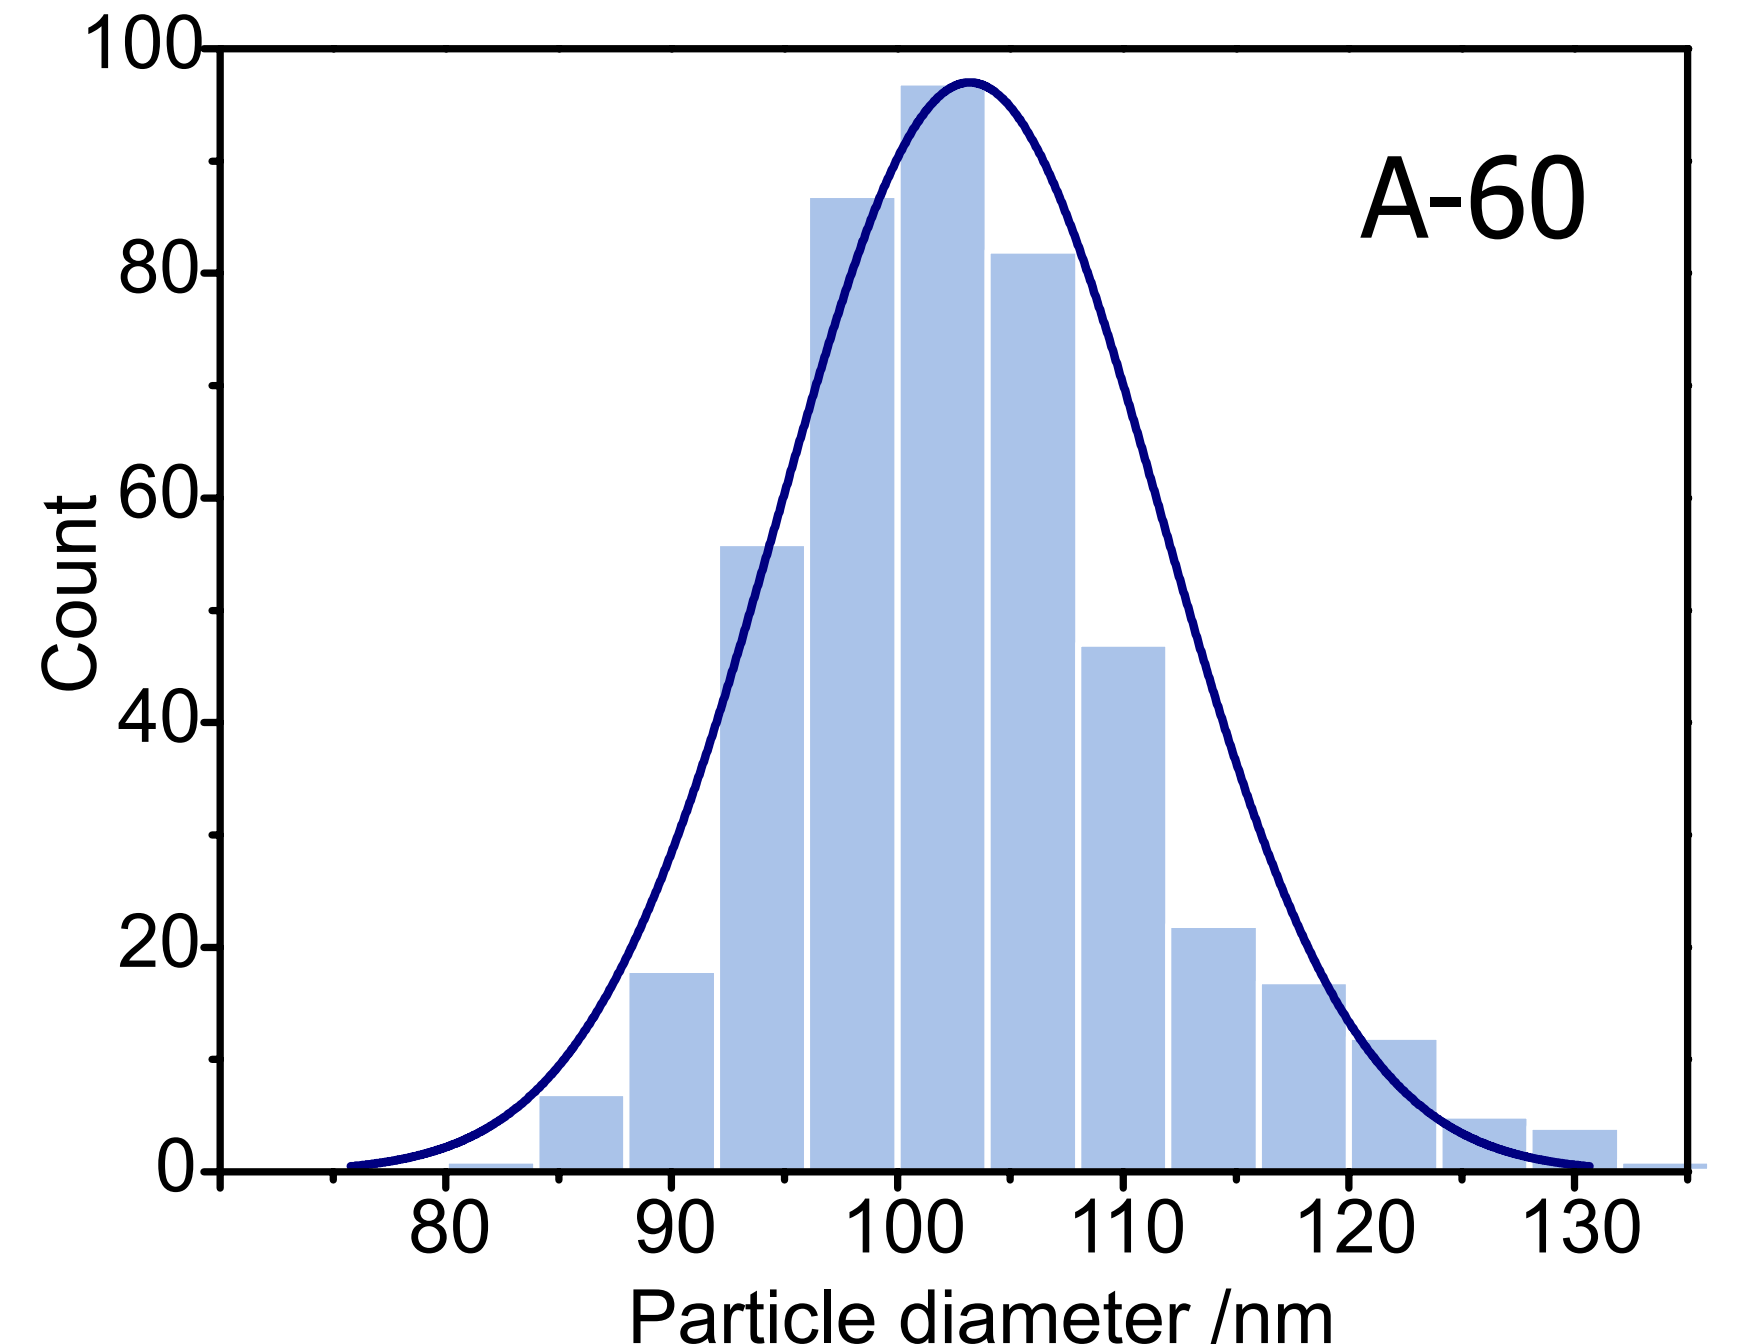

Supplement: s1 [file s1]

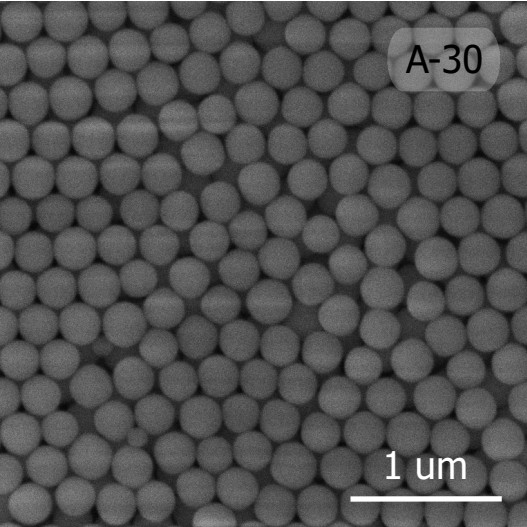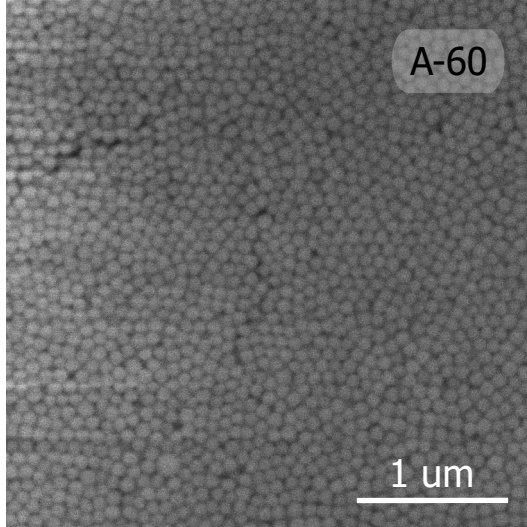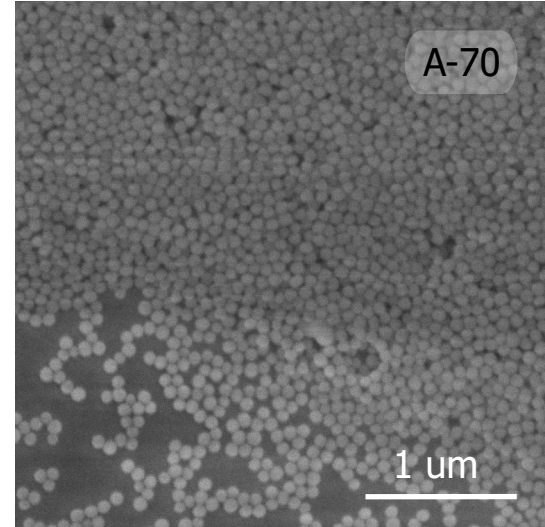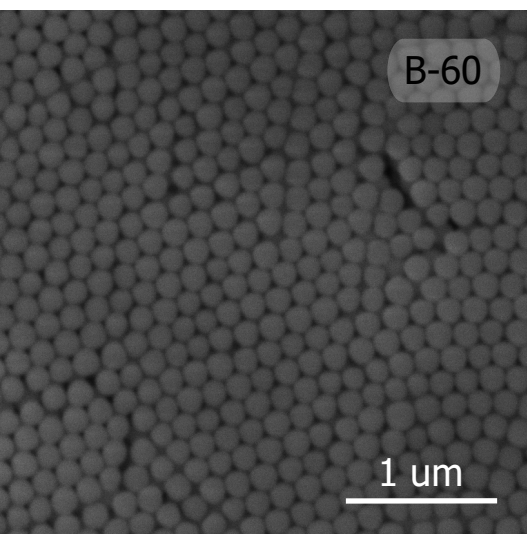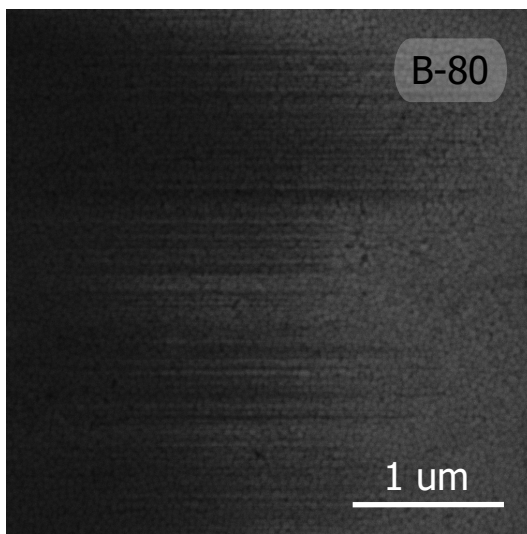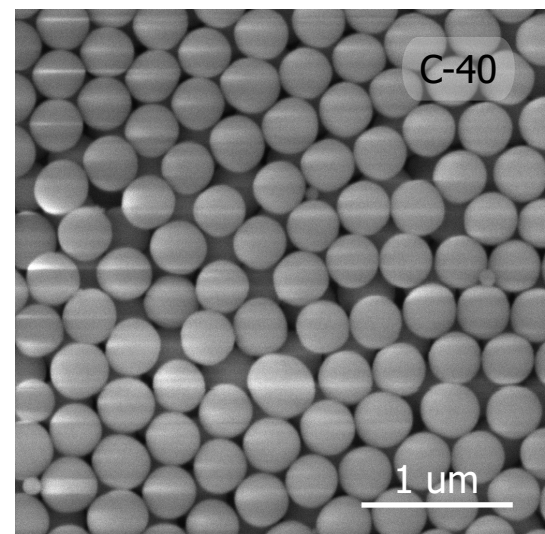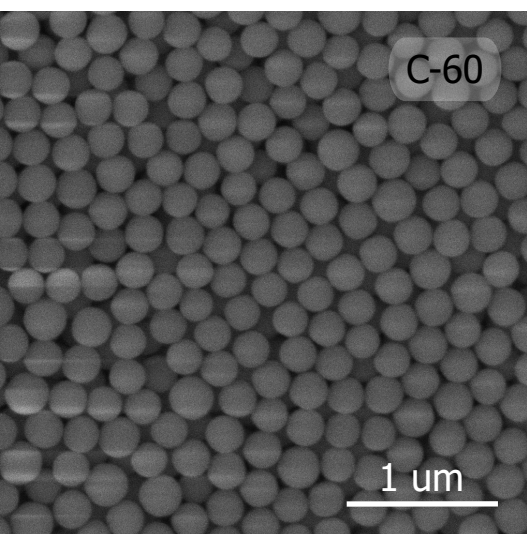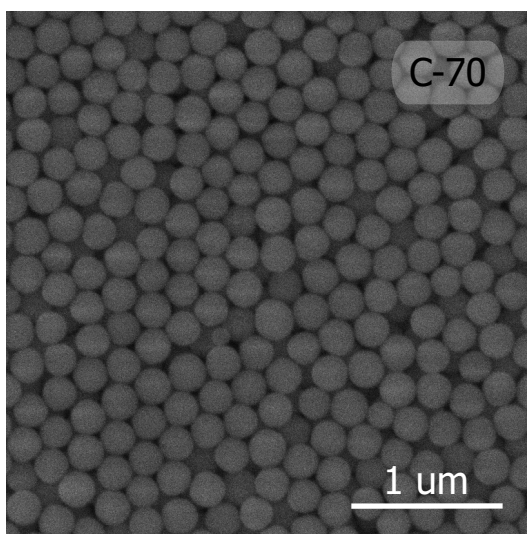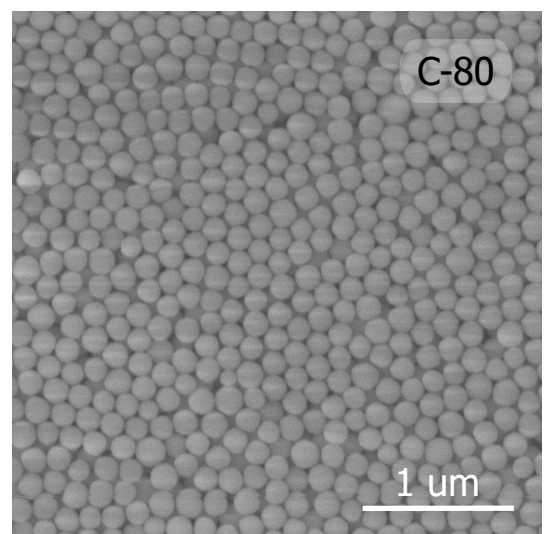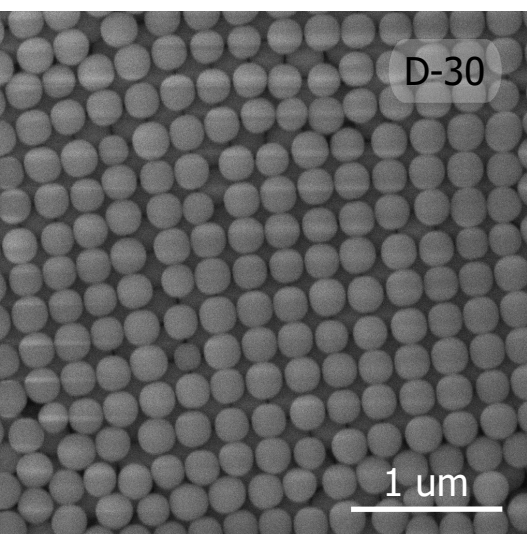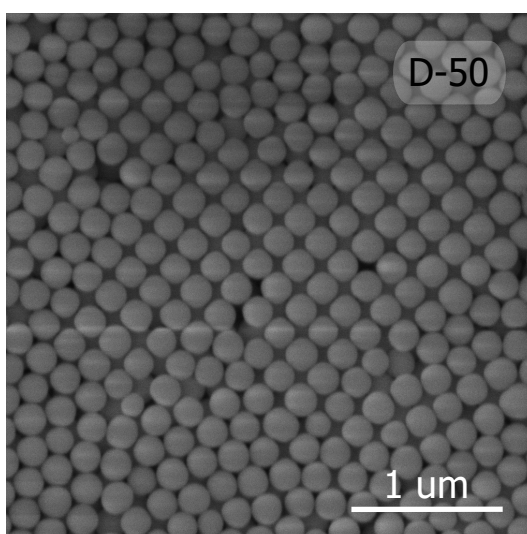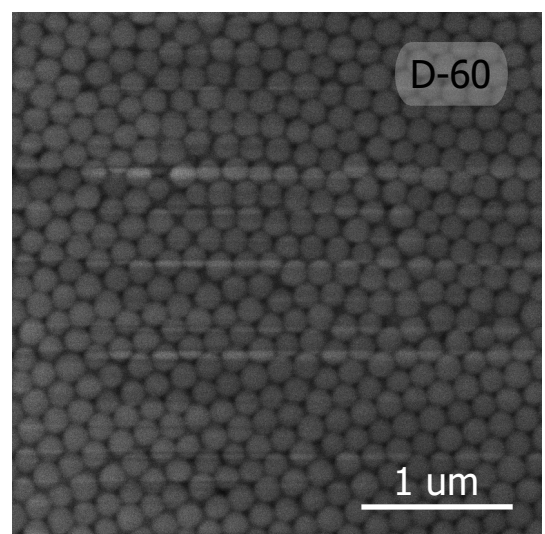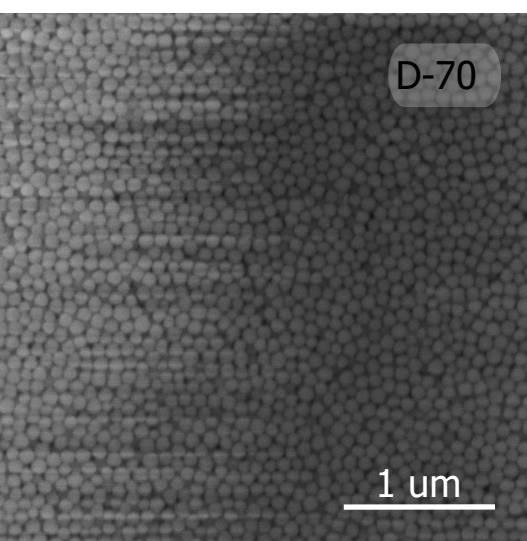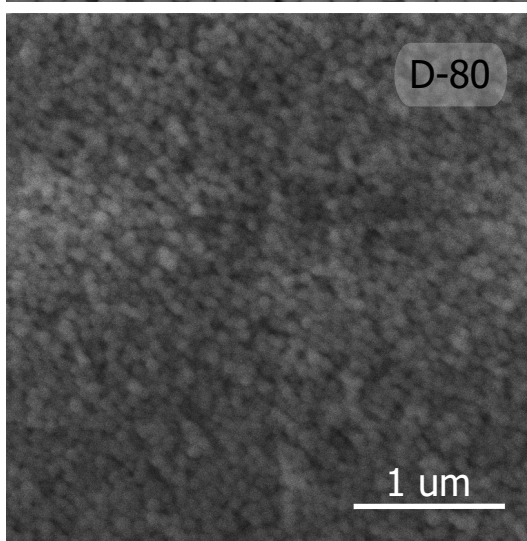

Supplement: s1 [file s1]

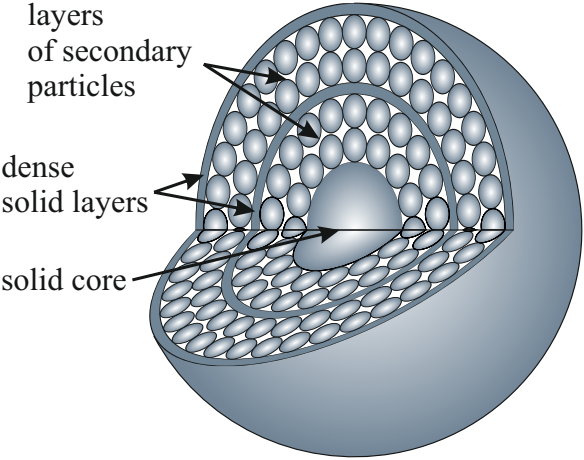

Supplement: s1 [file s1]

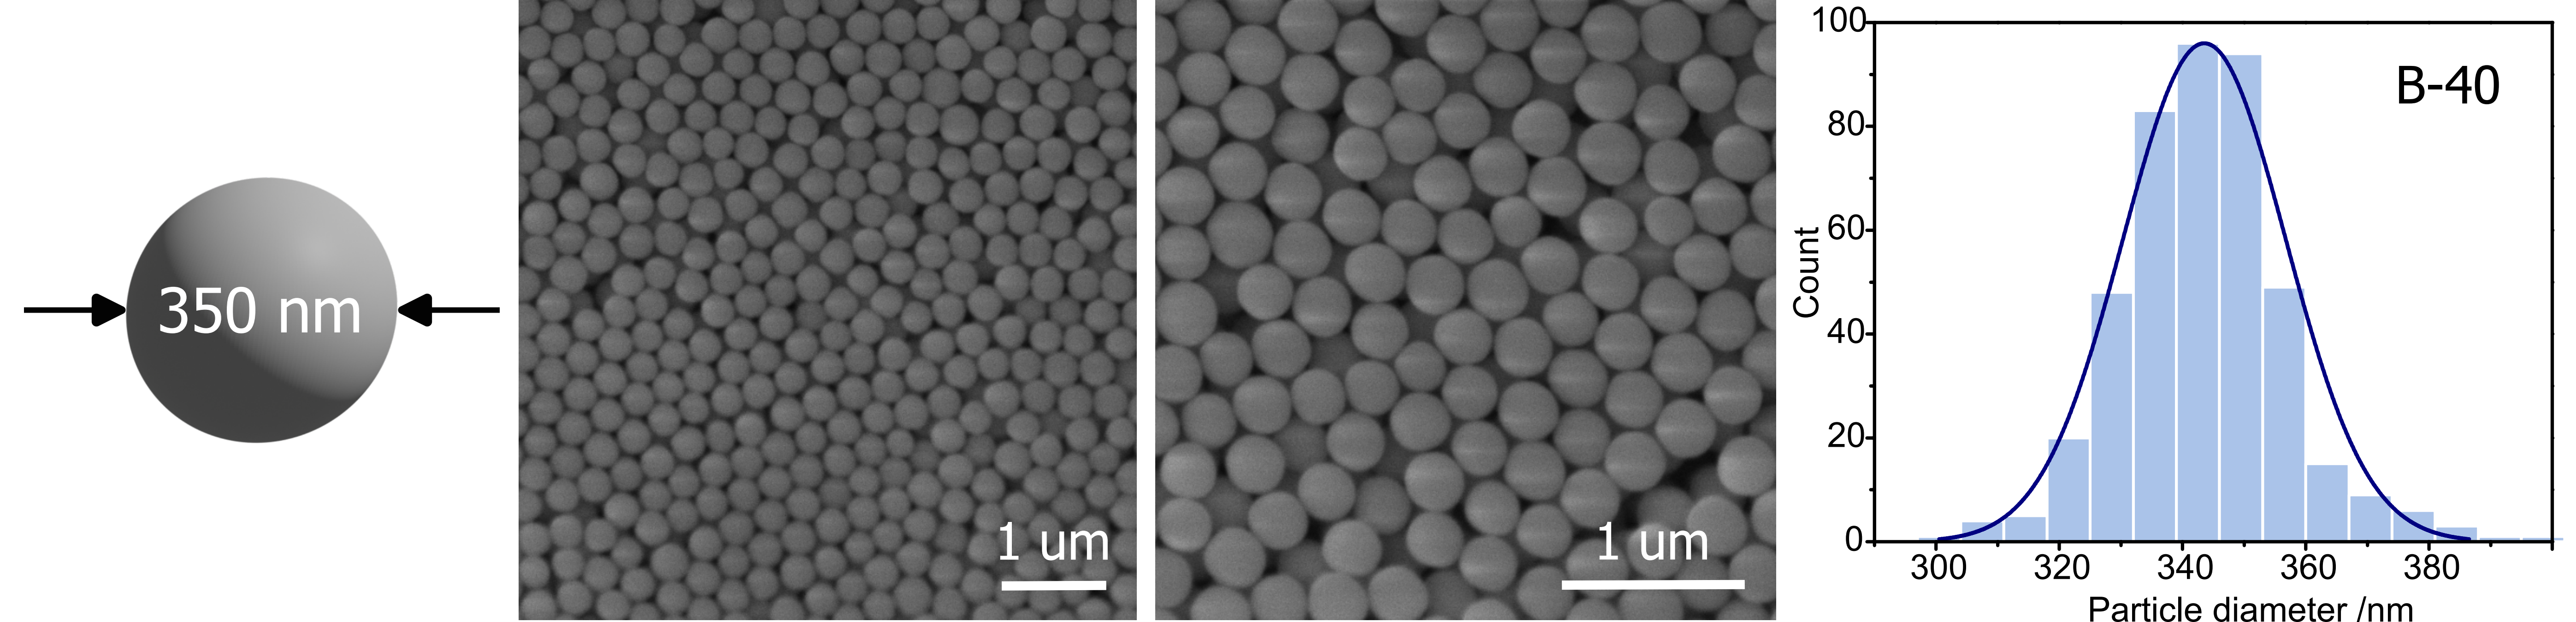

Supplement: s1 [file s1]

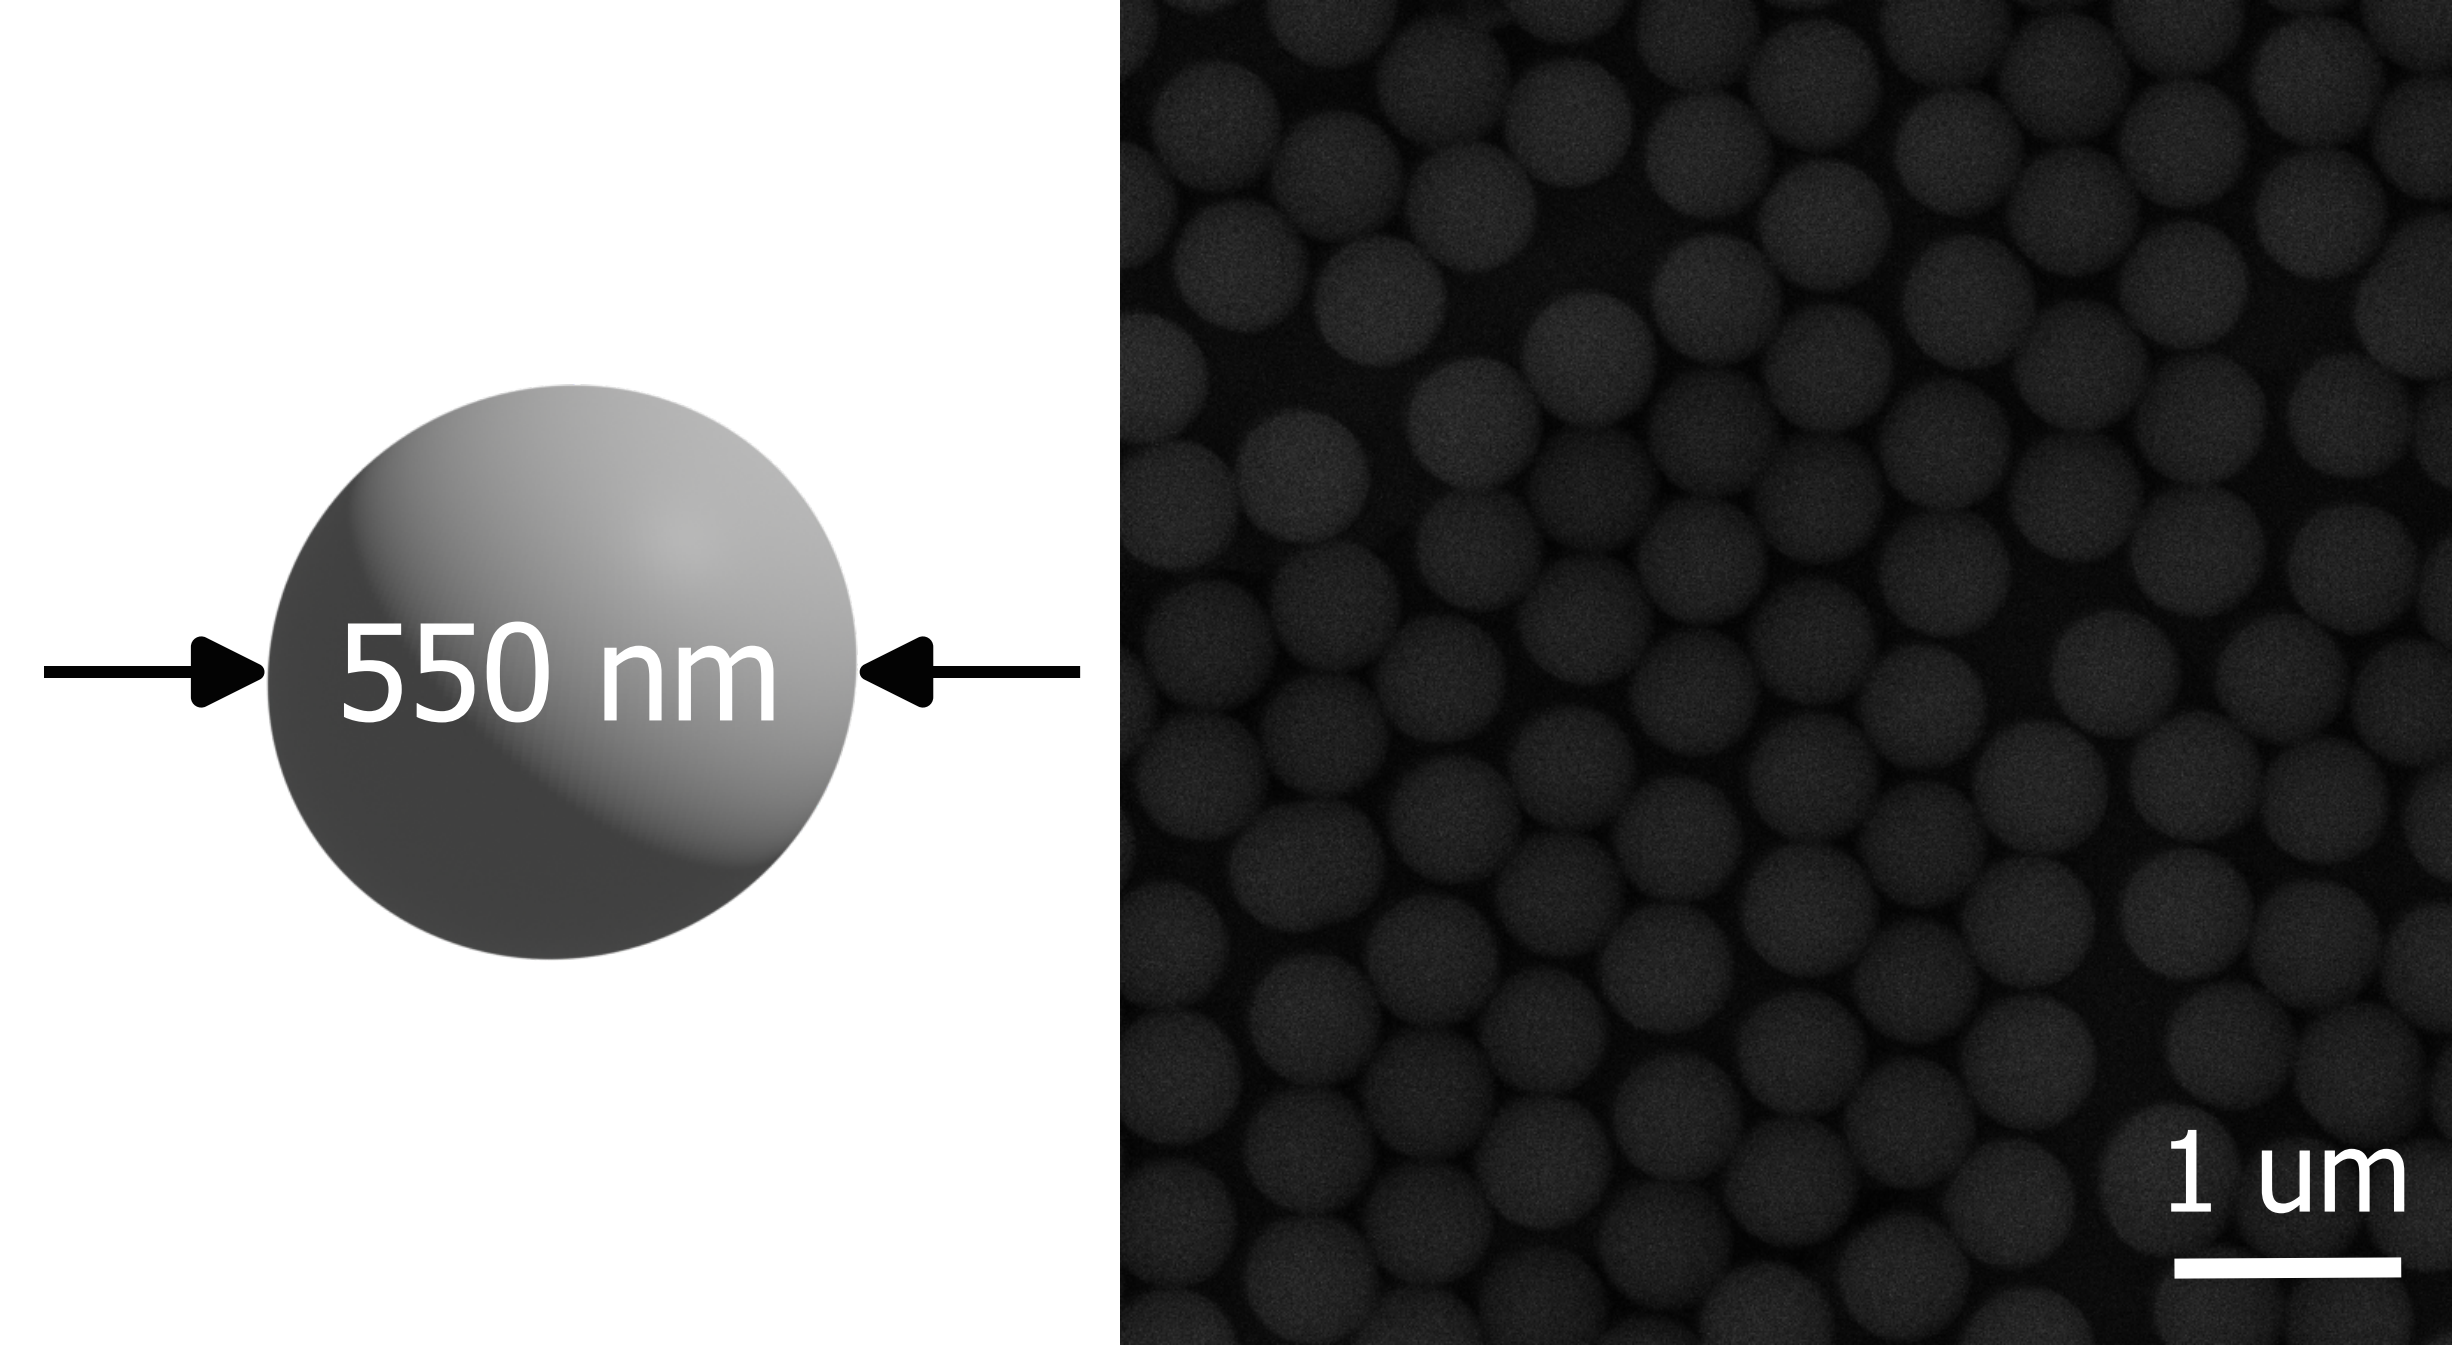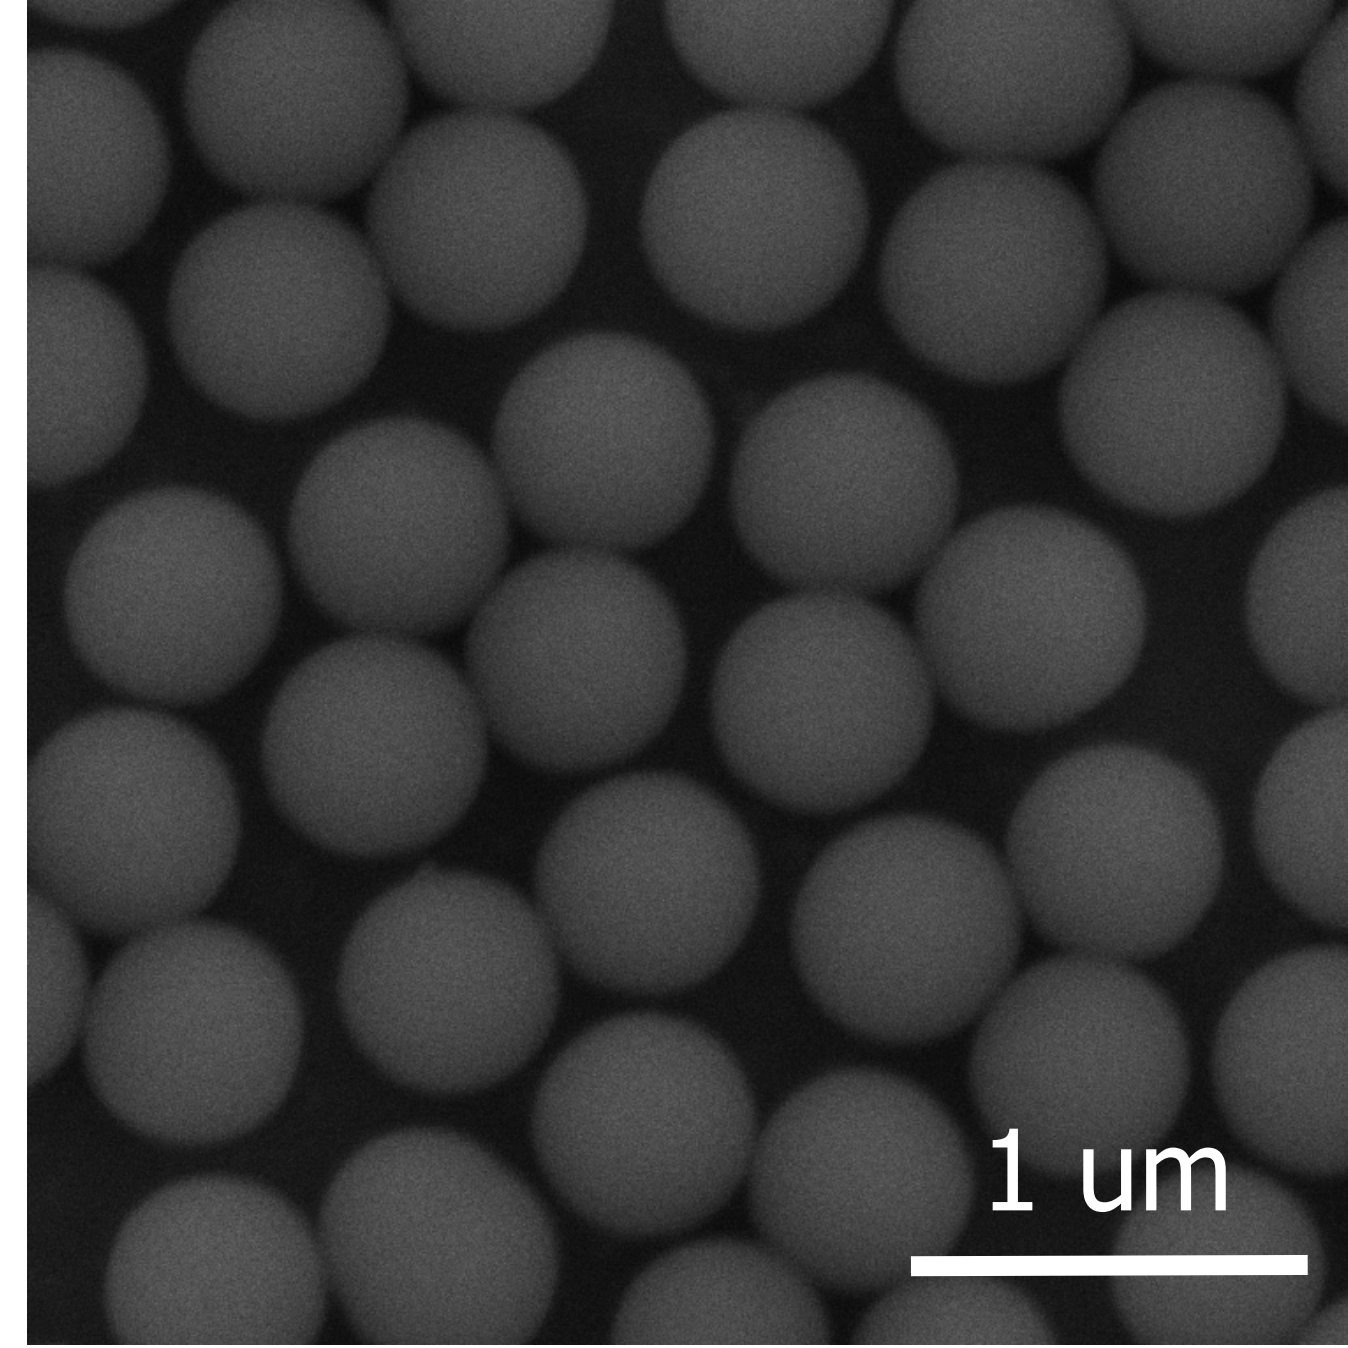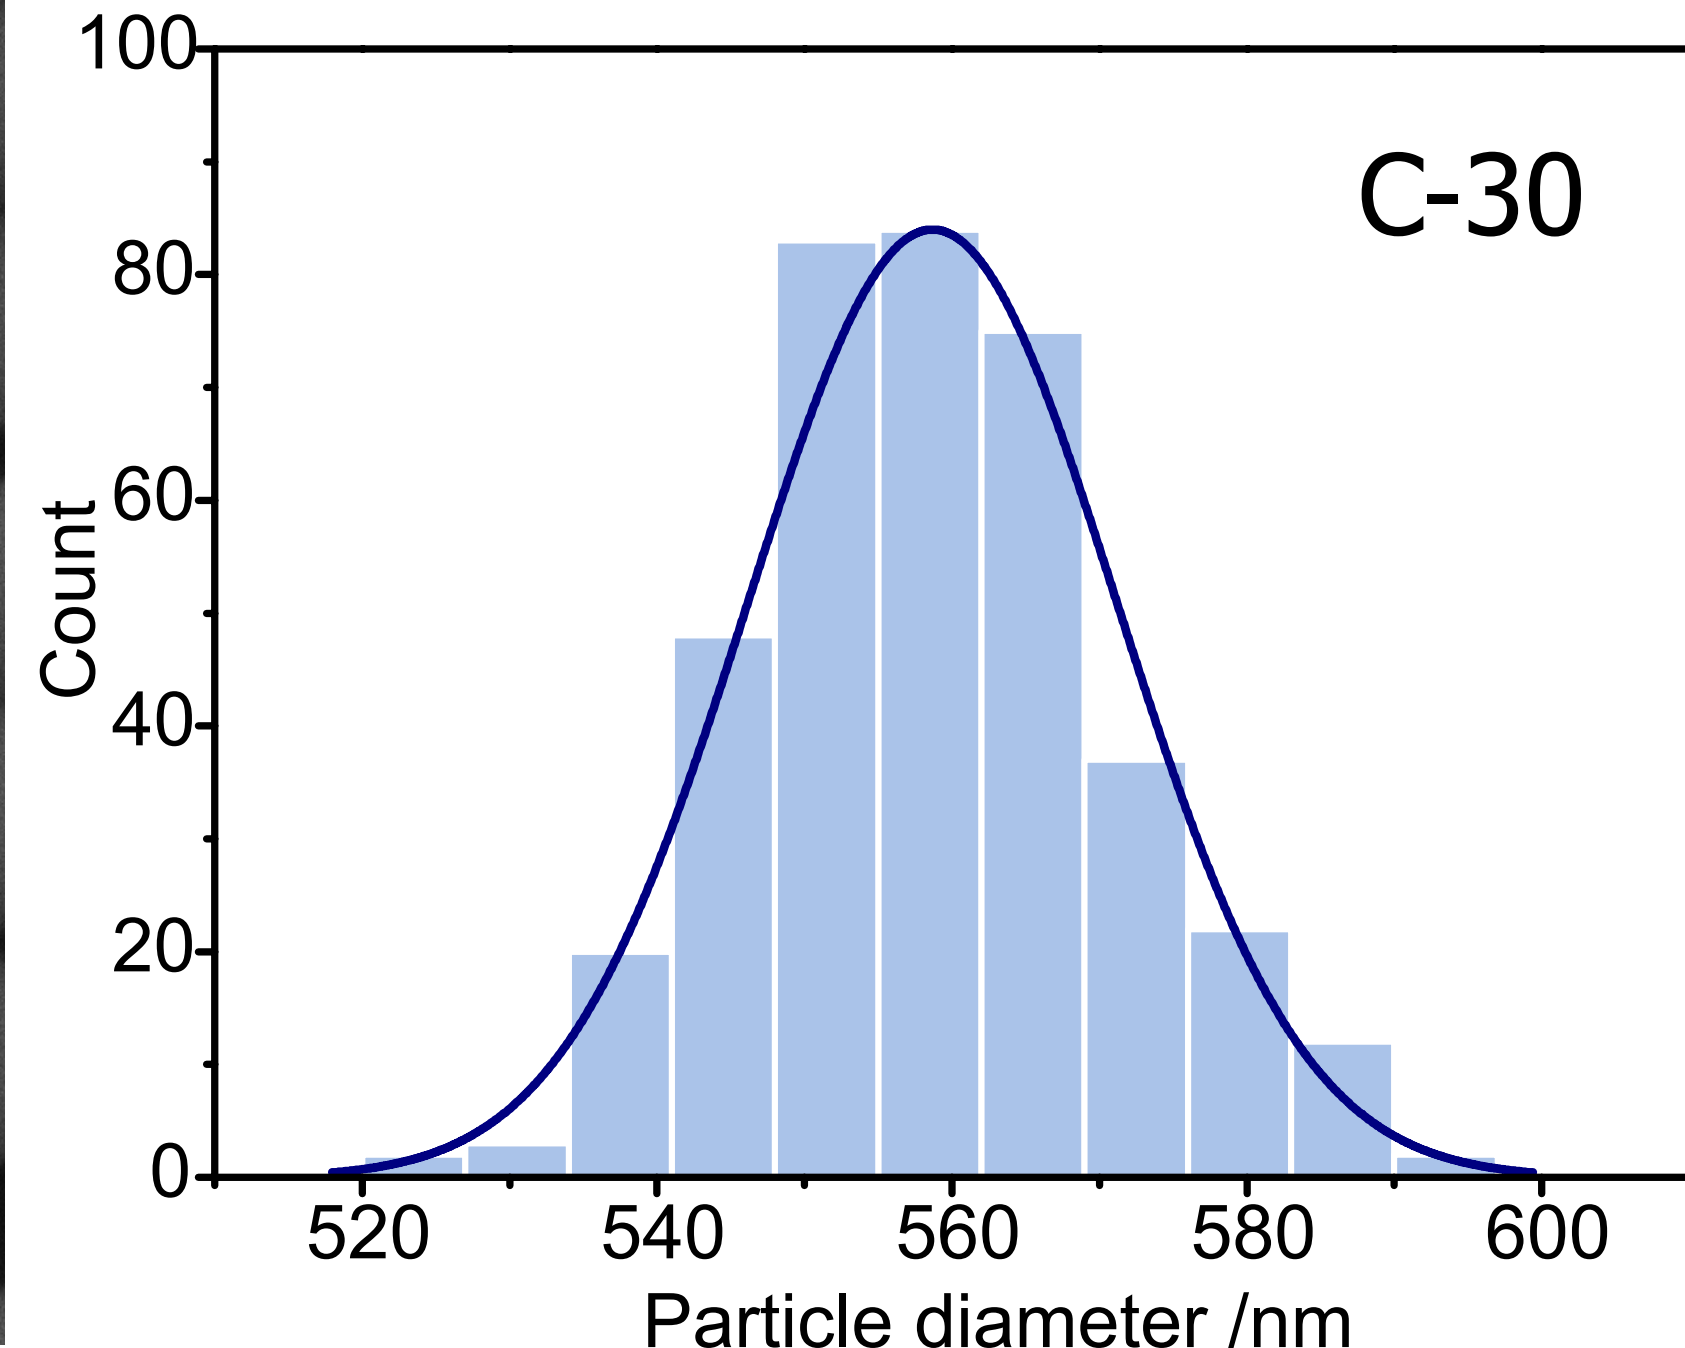

Supplement: s1 [file s1]

layer  
of secondary  
particles

solid  
core

dense  
solid  
shell

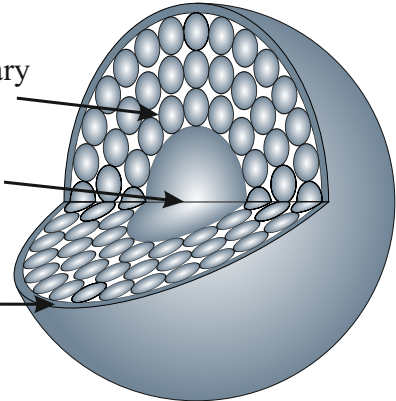

Supplement: s1 [file s1]

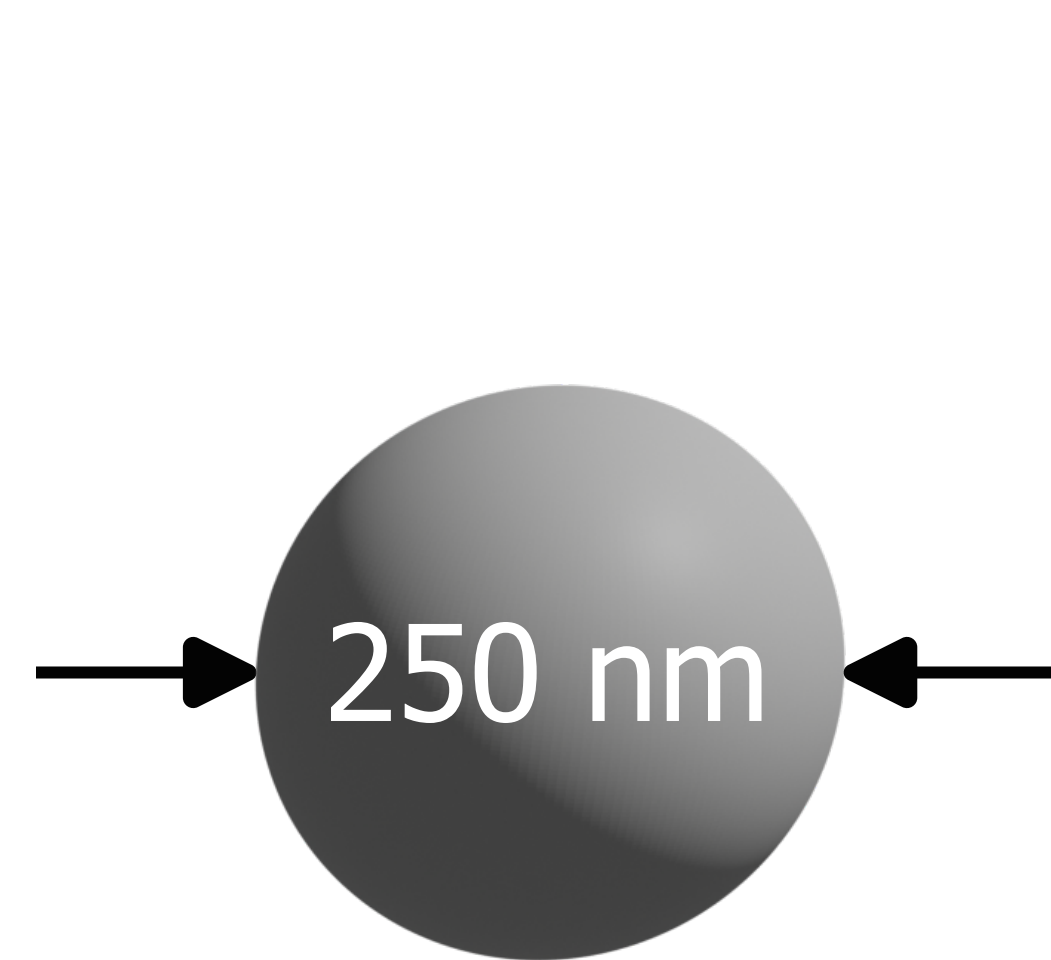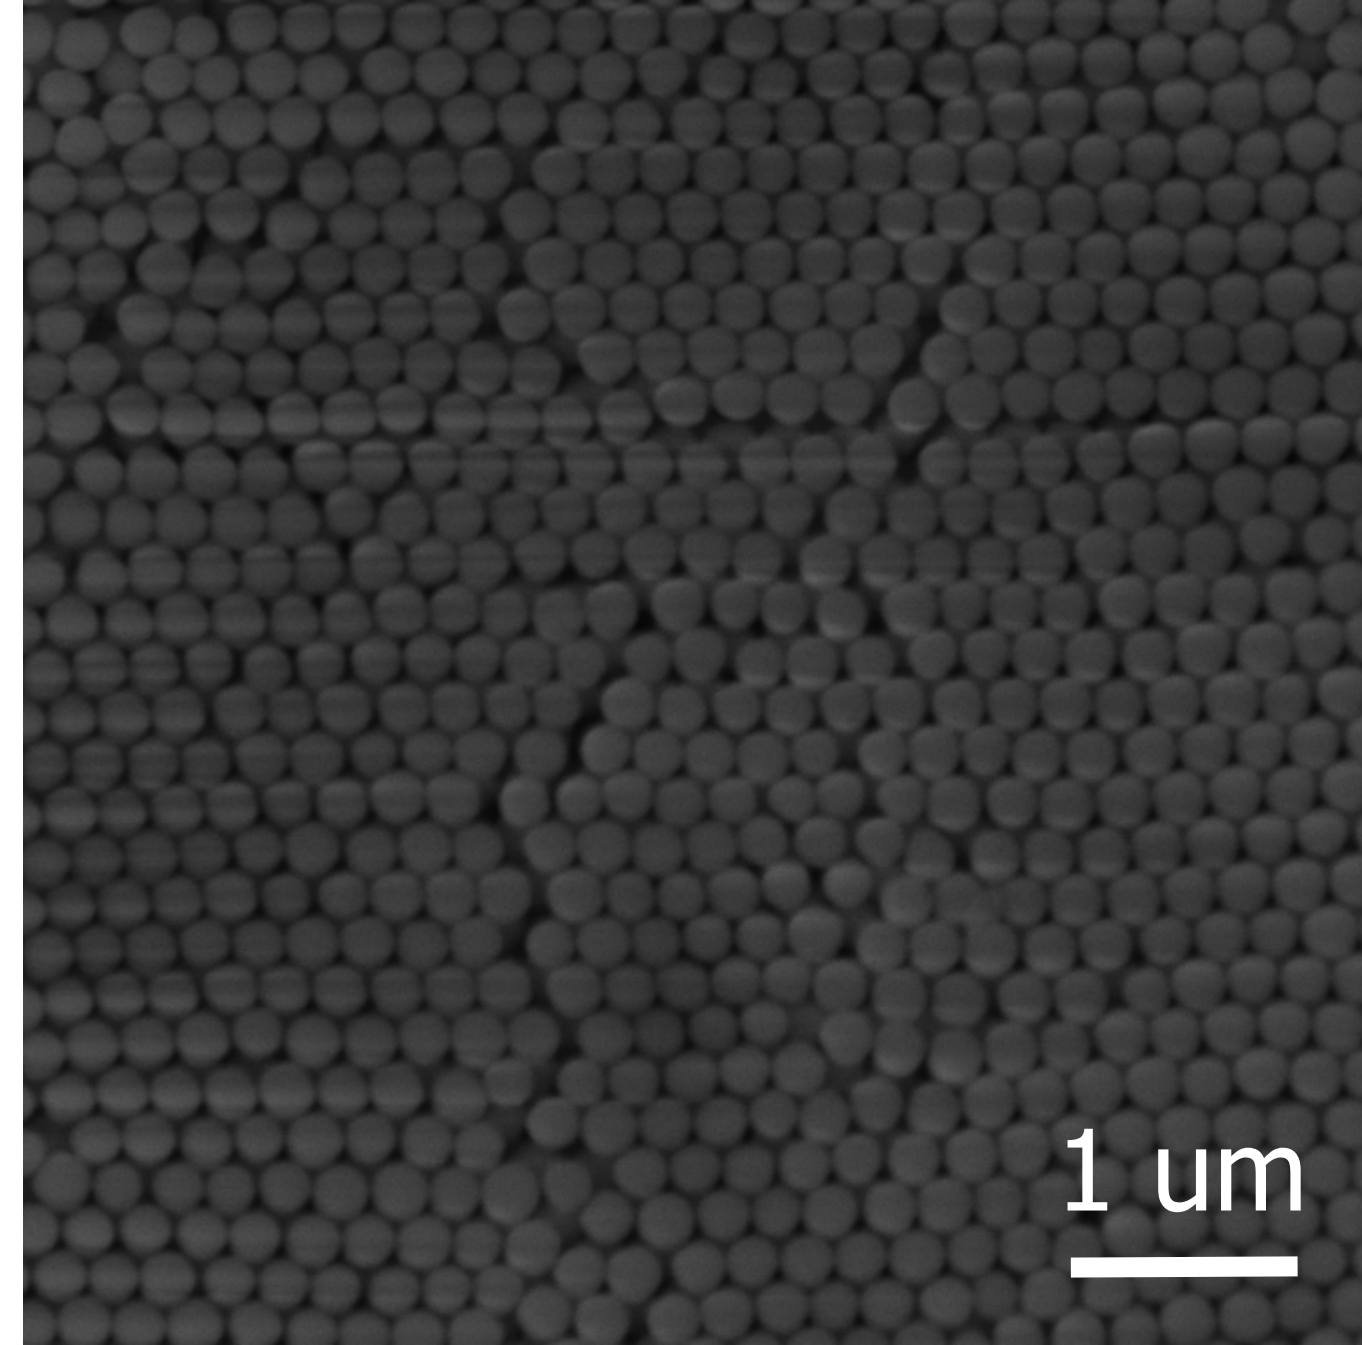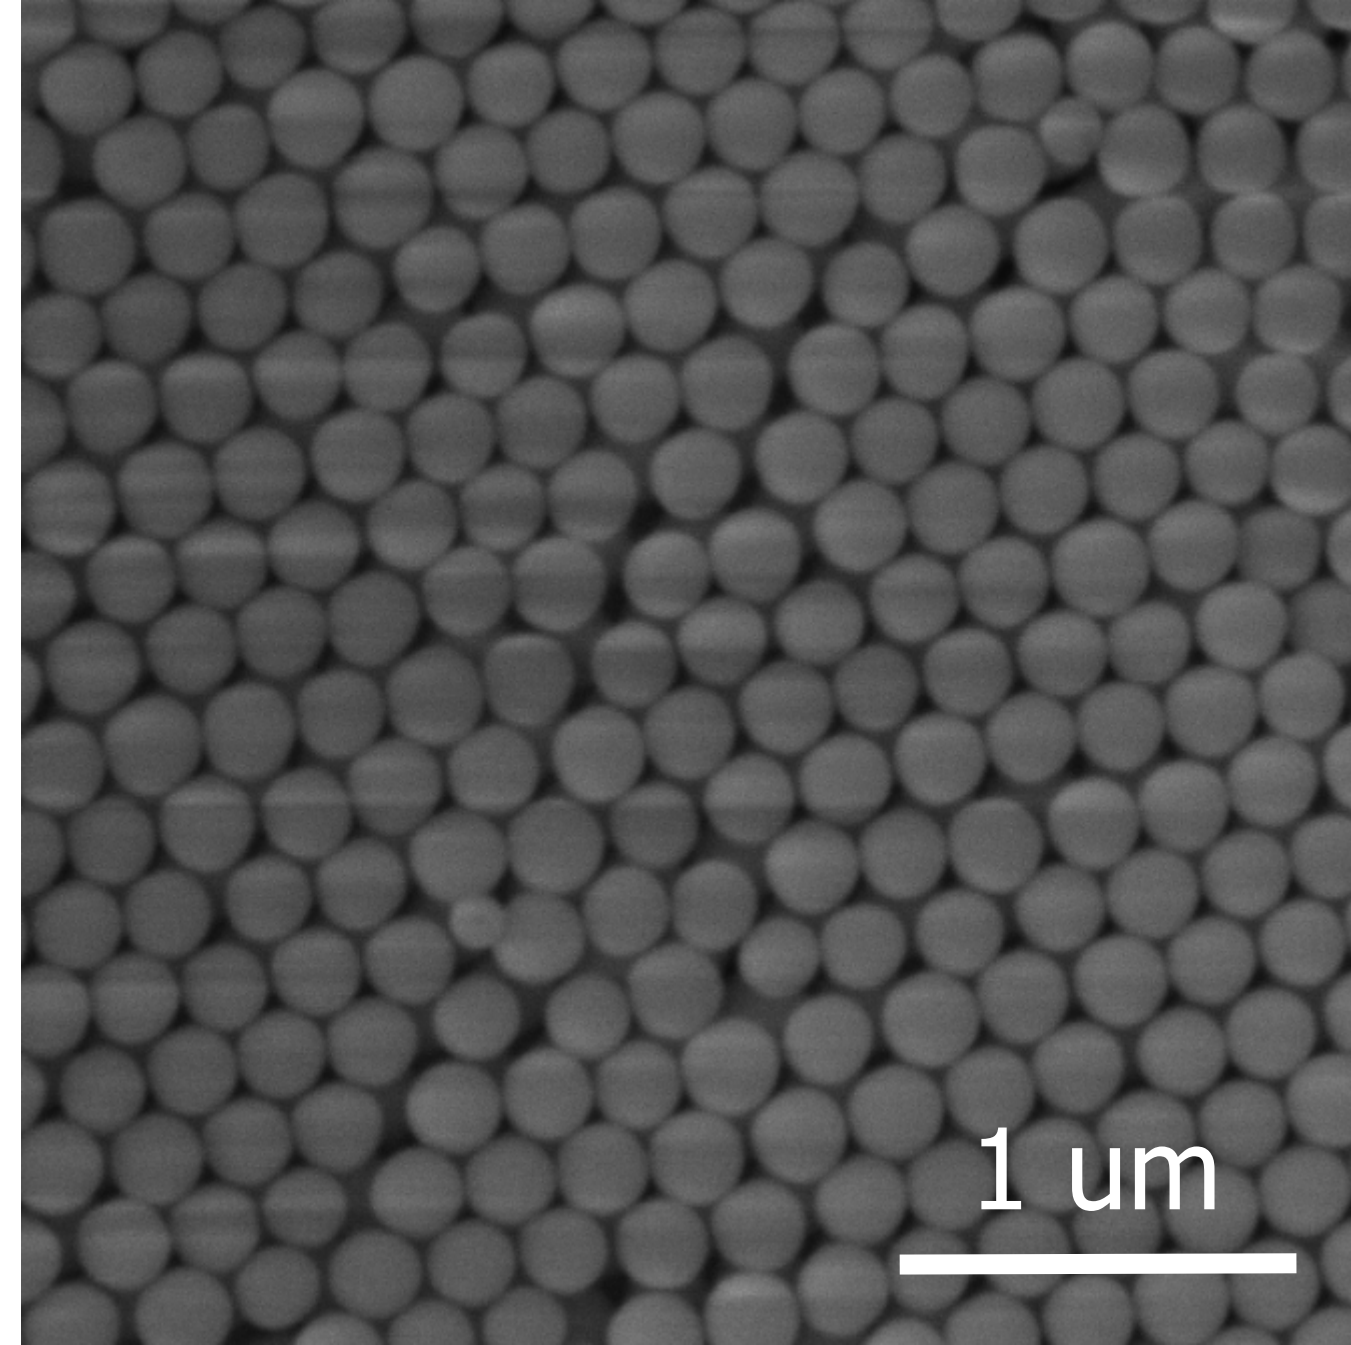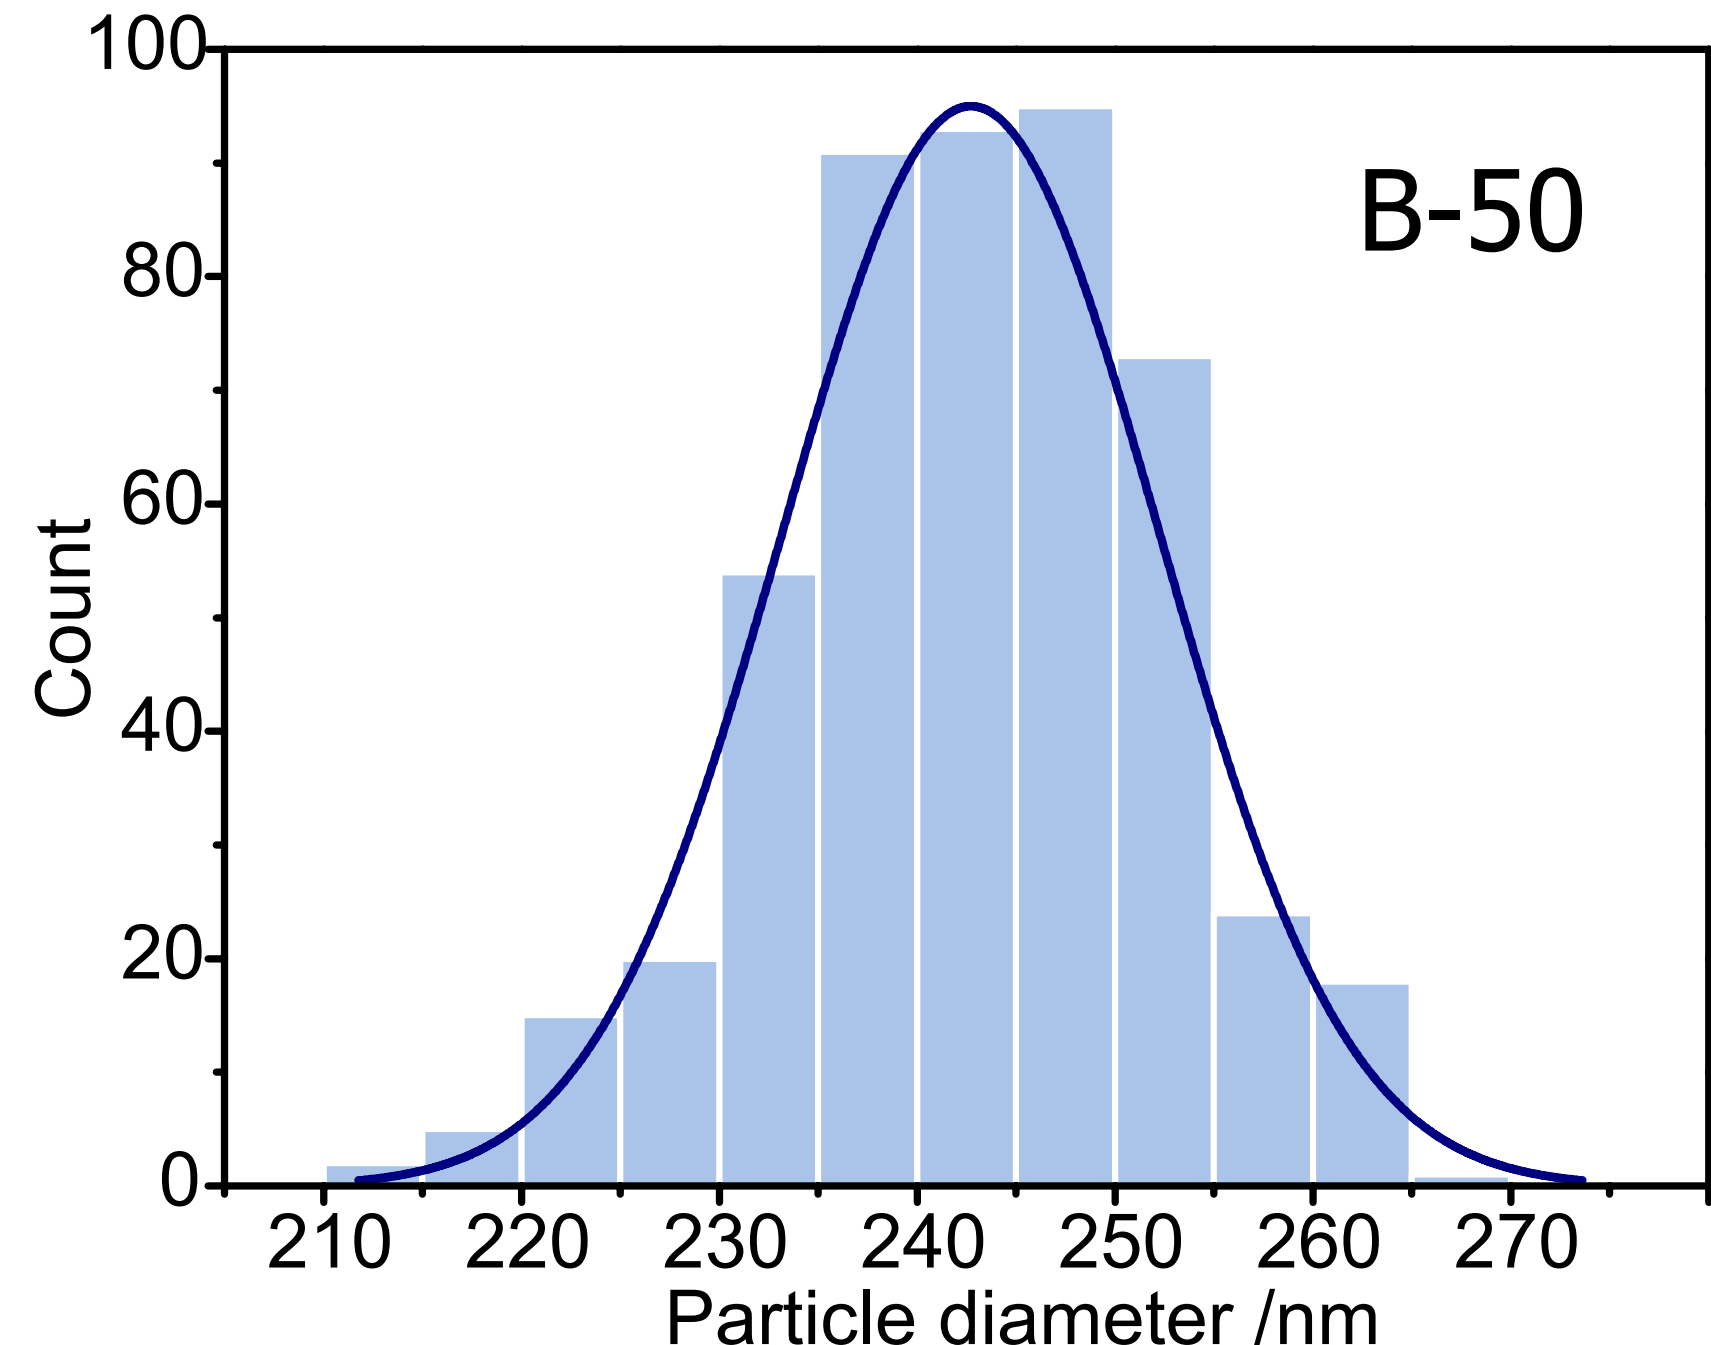

Supplement: s1 [file s1]

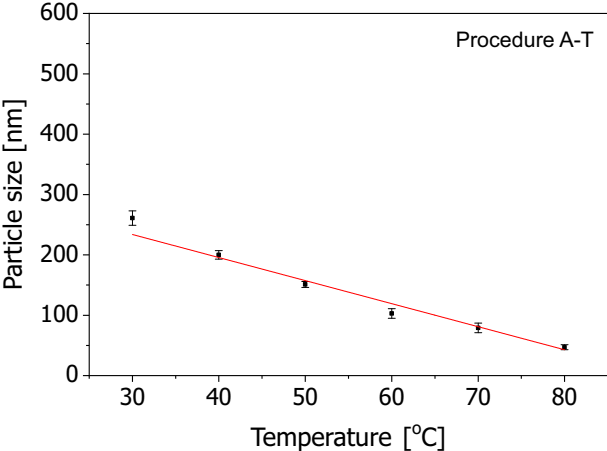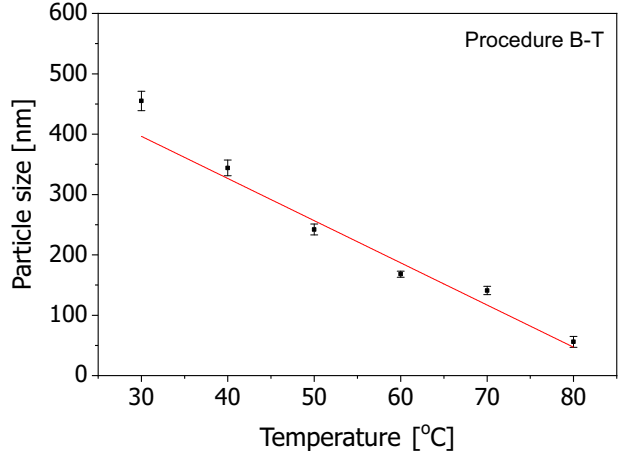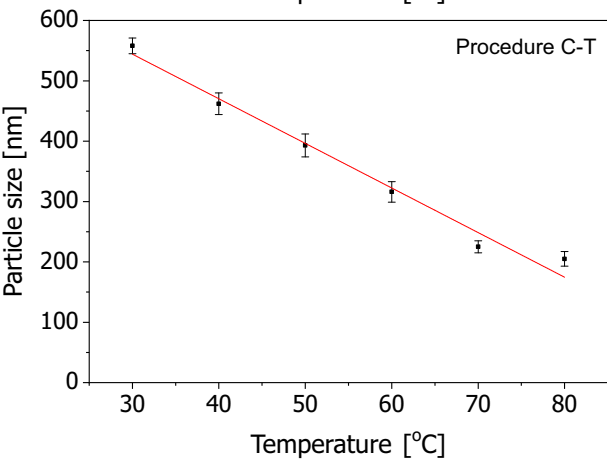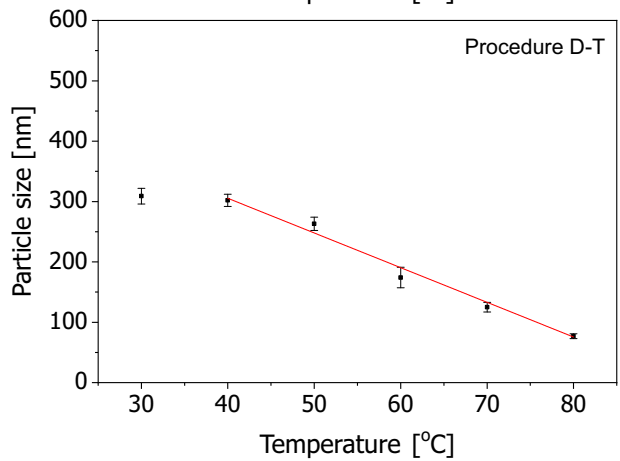

Supplement: s1 [file s1]

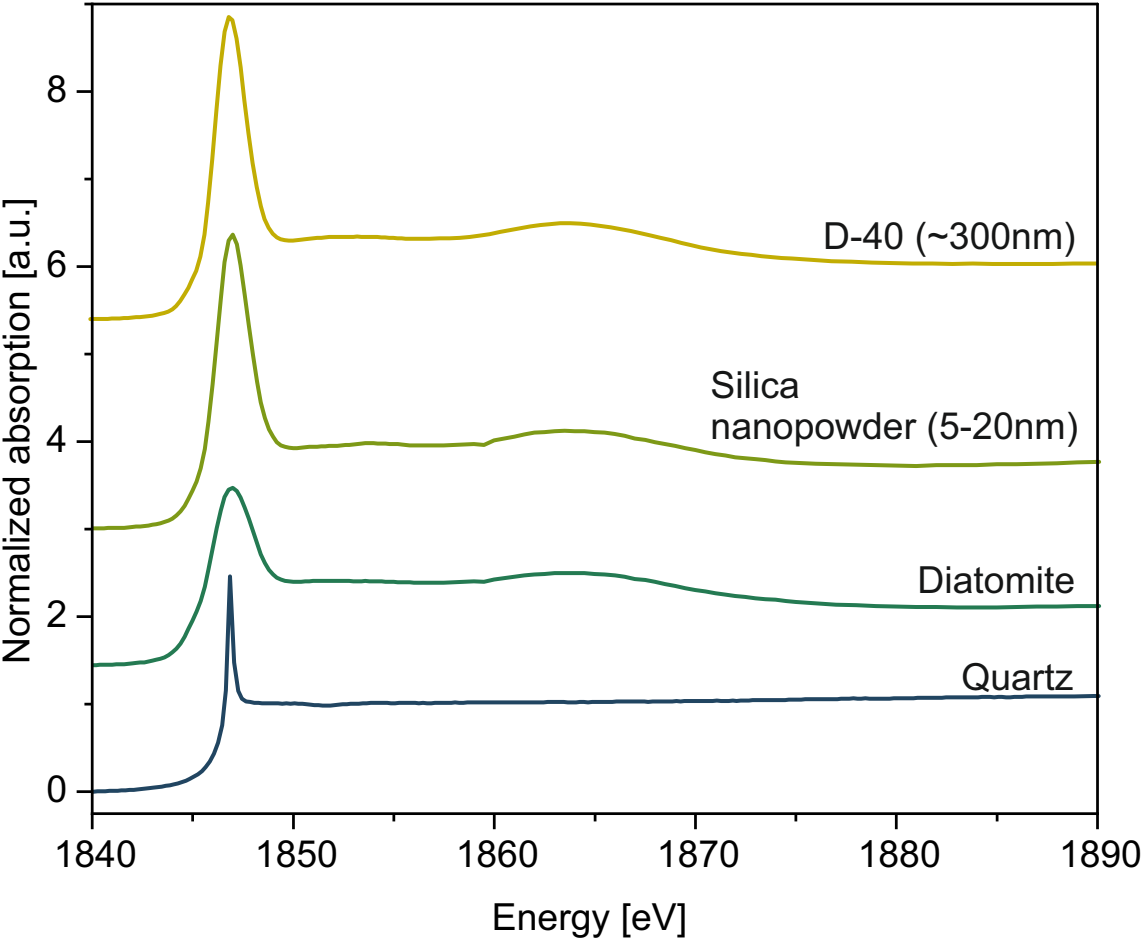

Supplement: s1 [file s1]

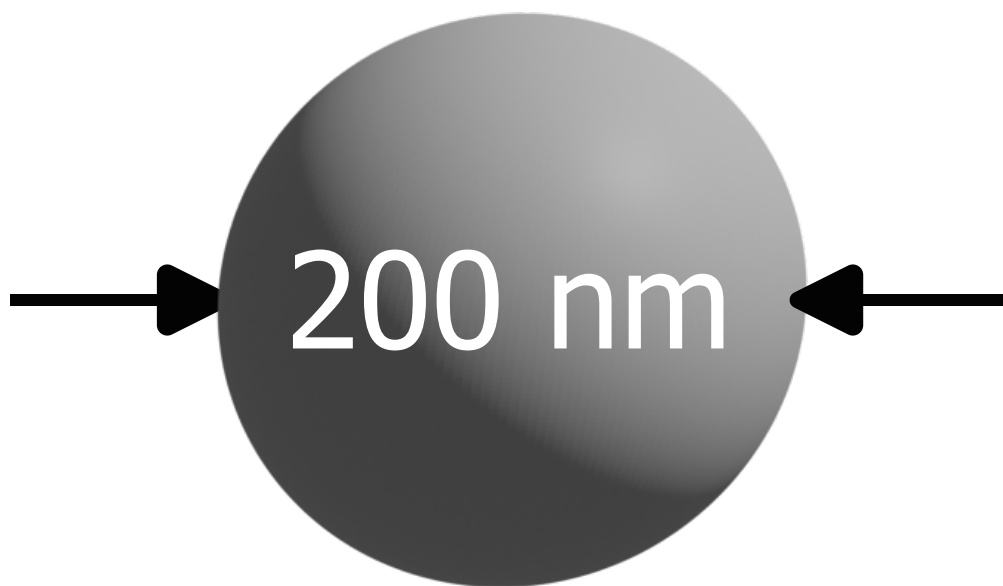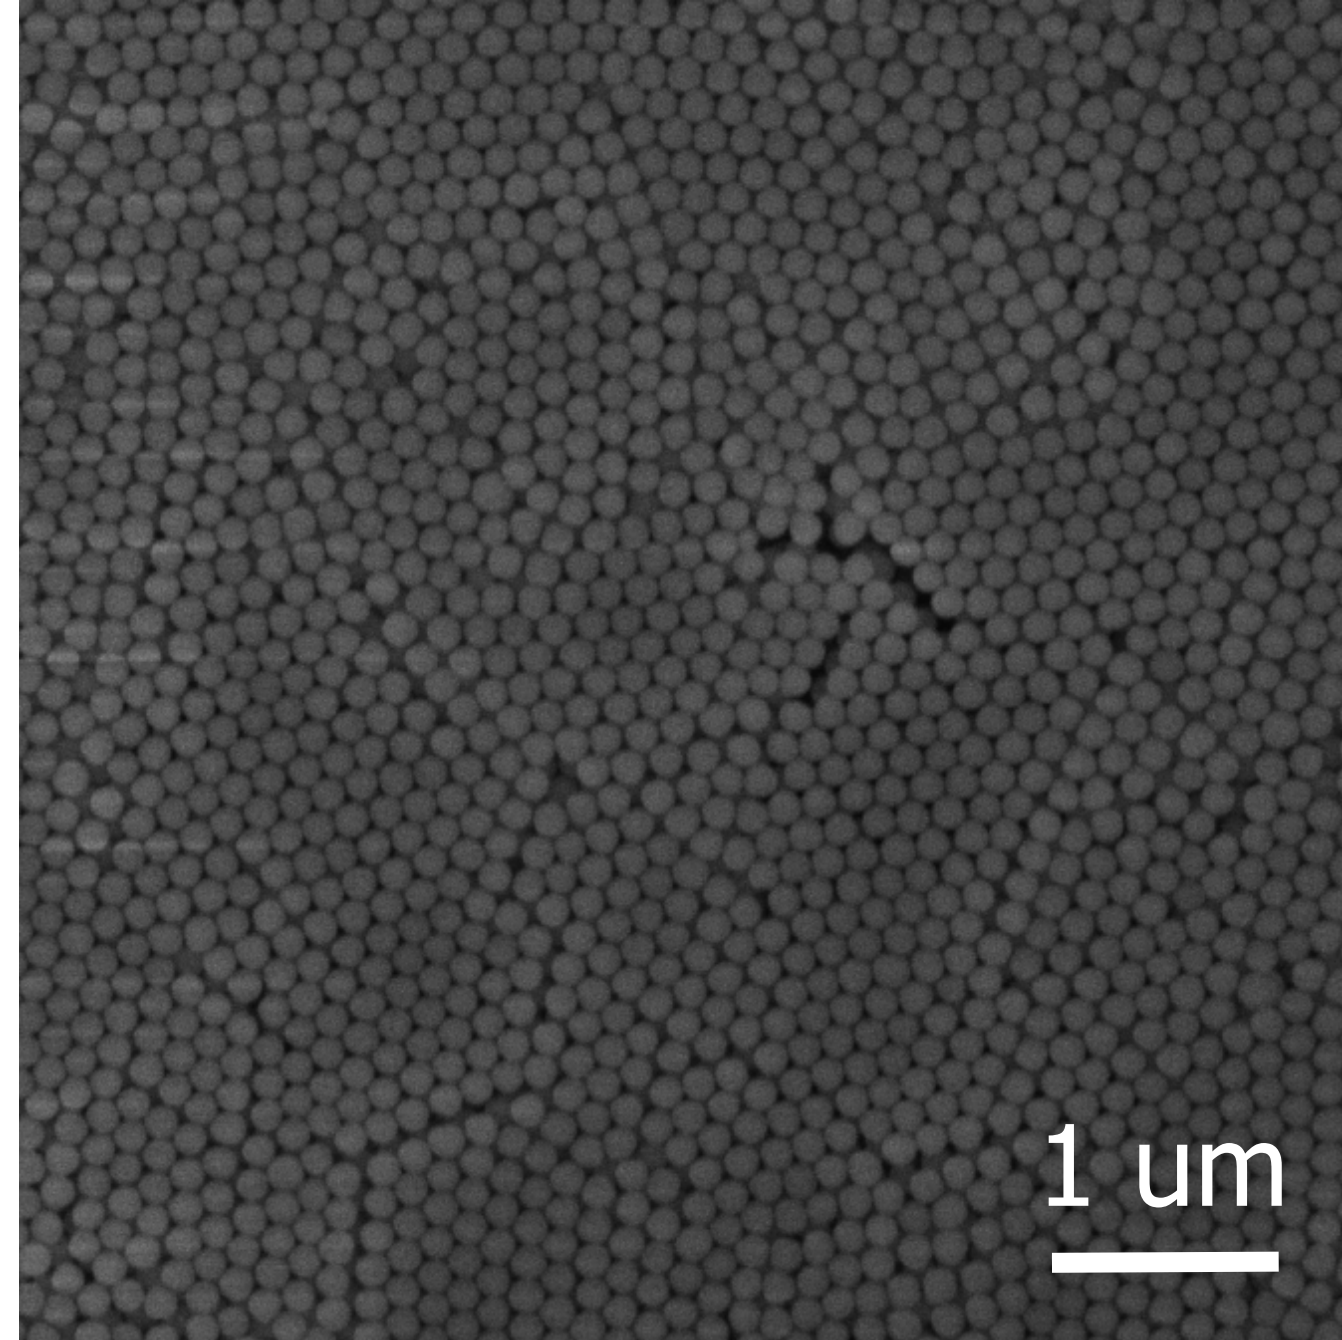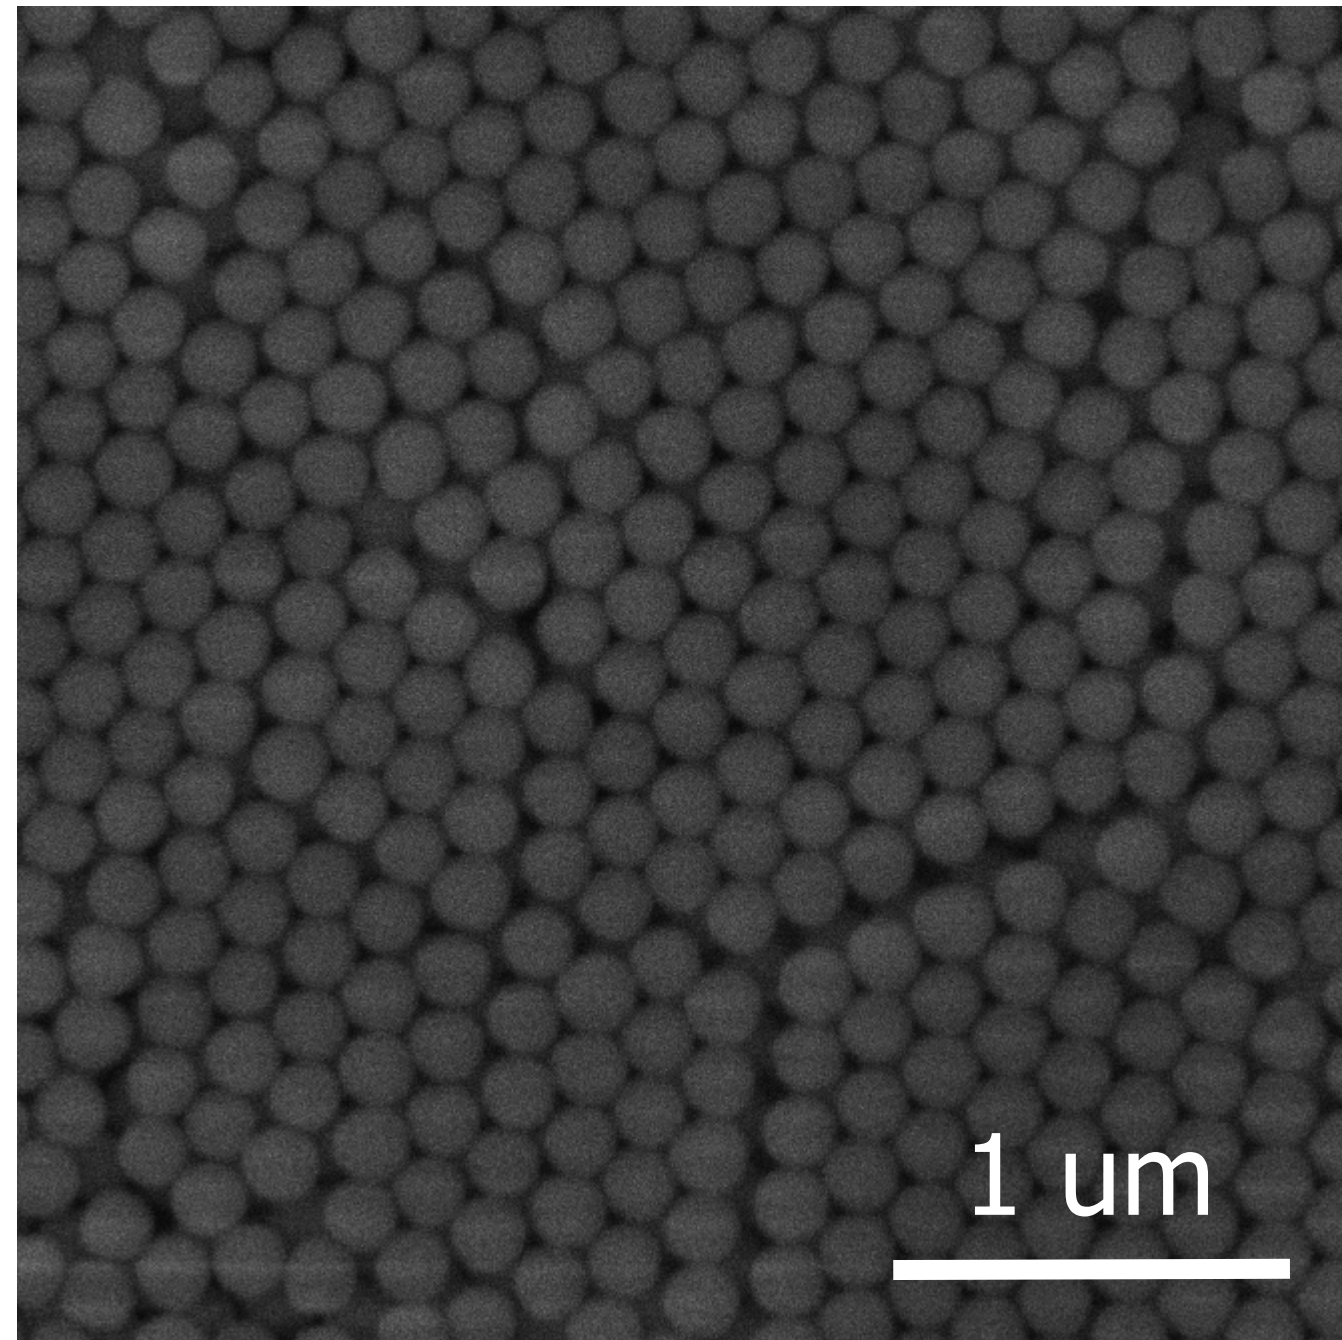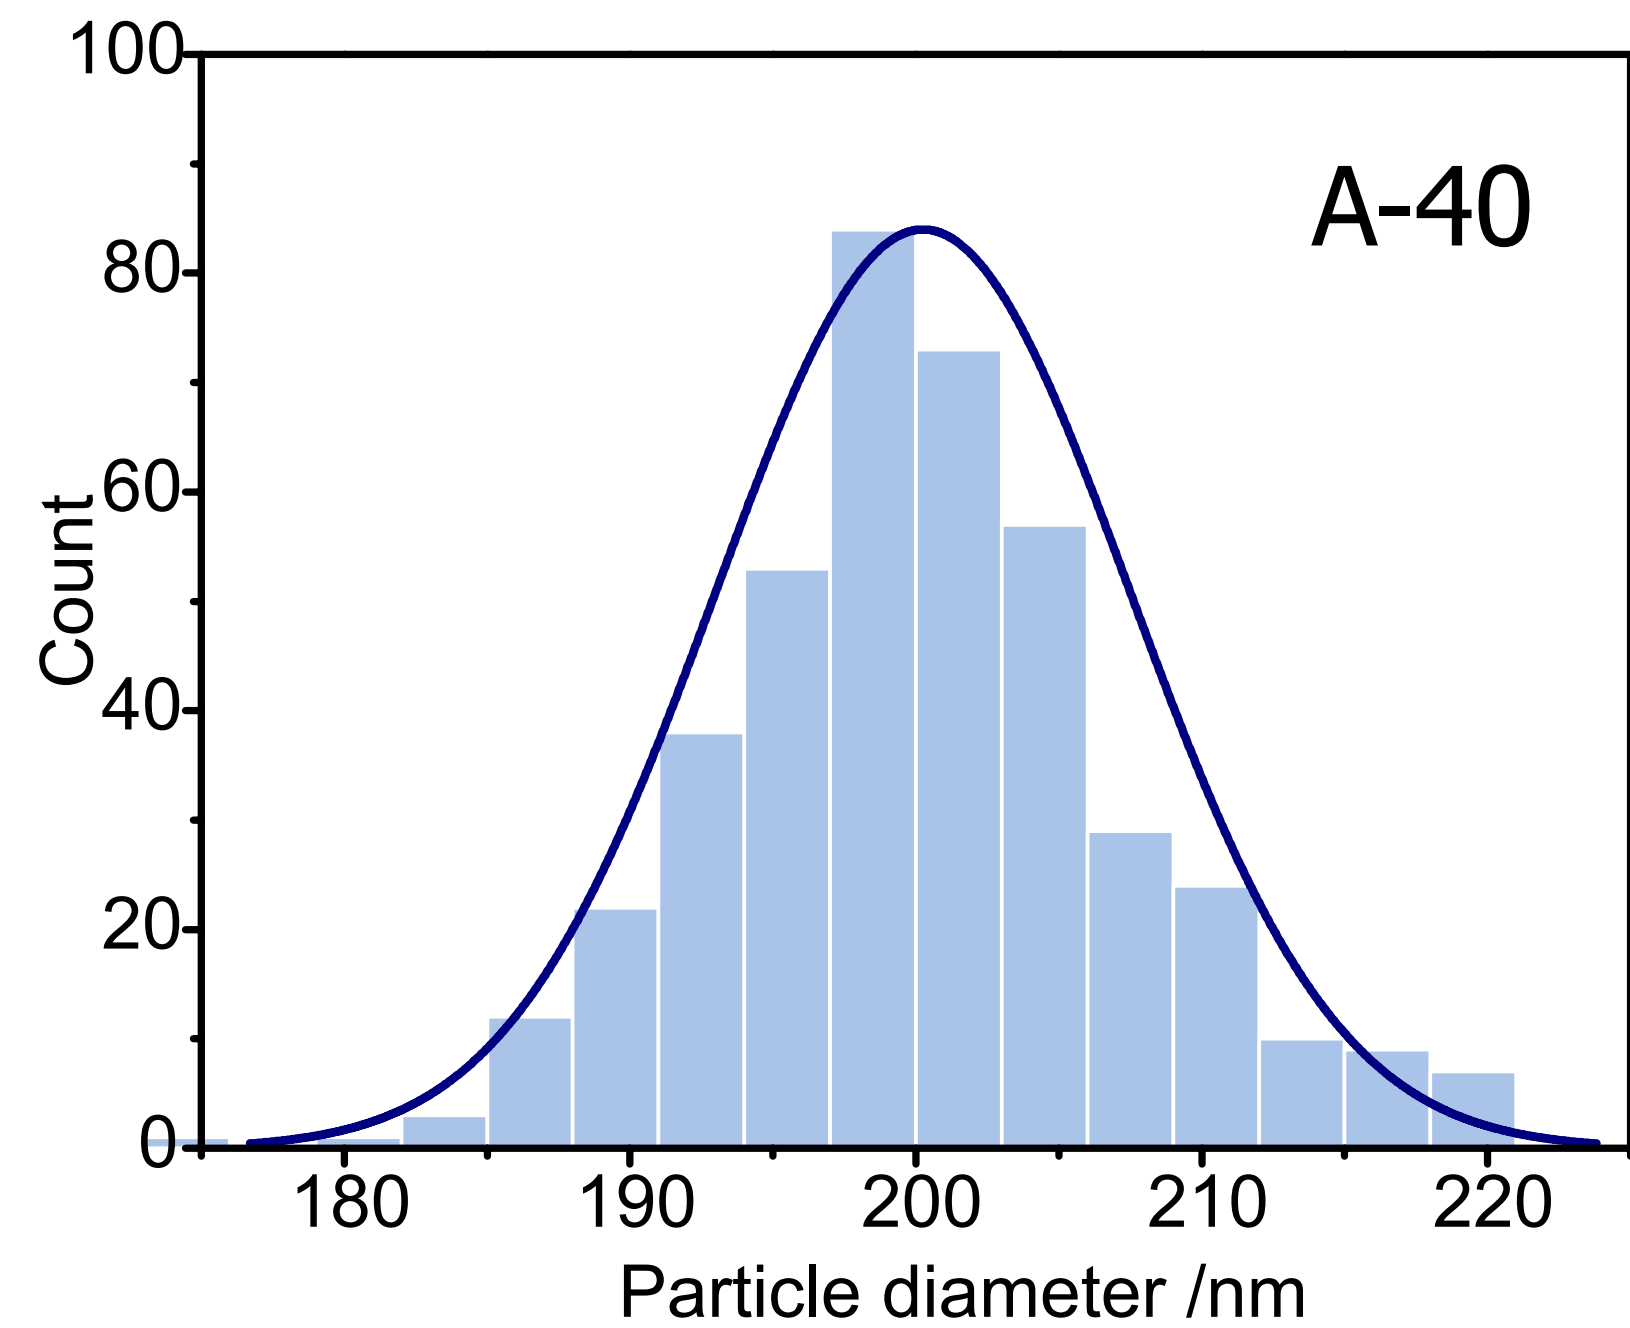

Supplement: s1 [file s1]

$^{29}\text{Si}$  NMR  
6 kHz MAS

C-50 (400 nm)

D-40 (300 nm)

A-40 (200 nm)

A-60 (100 nm)

-60

-80

-100

-120

-140

-160

ppm from TMS

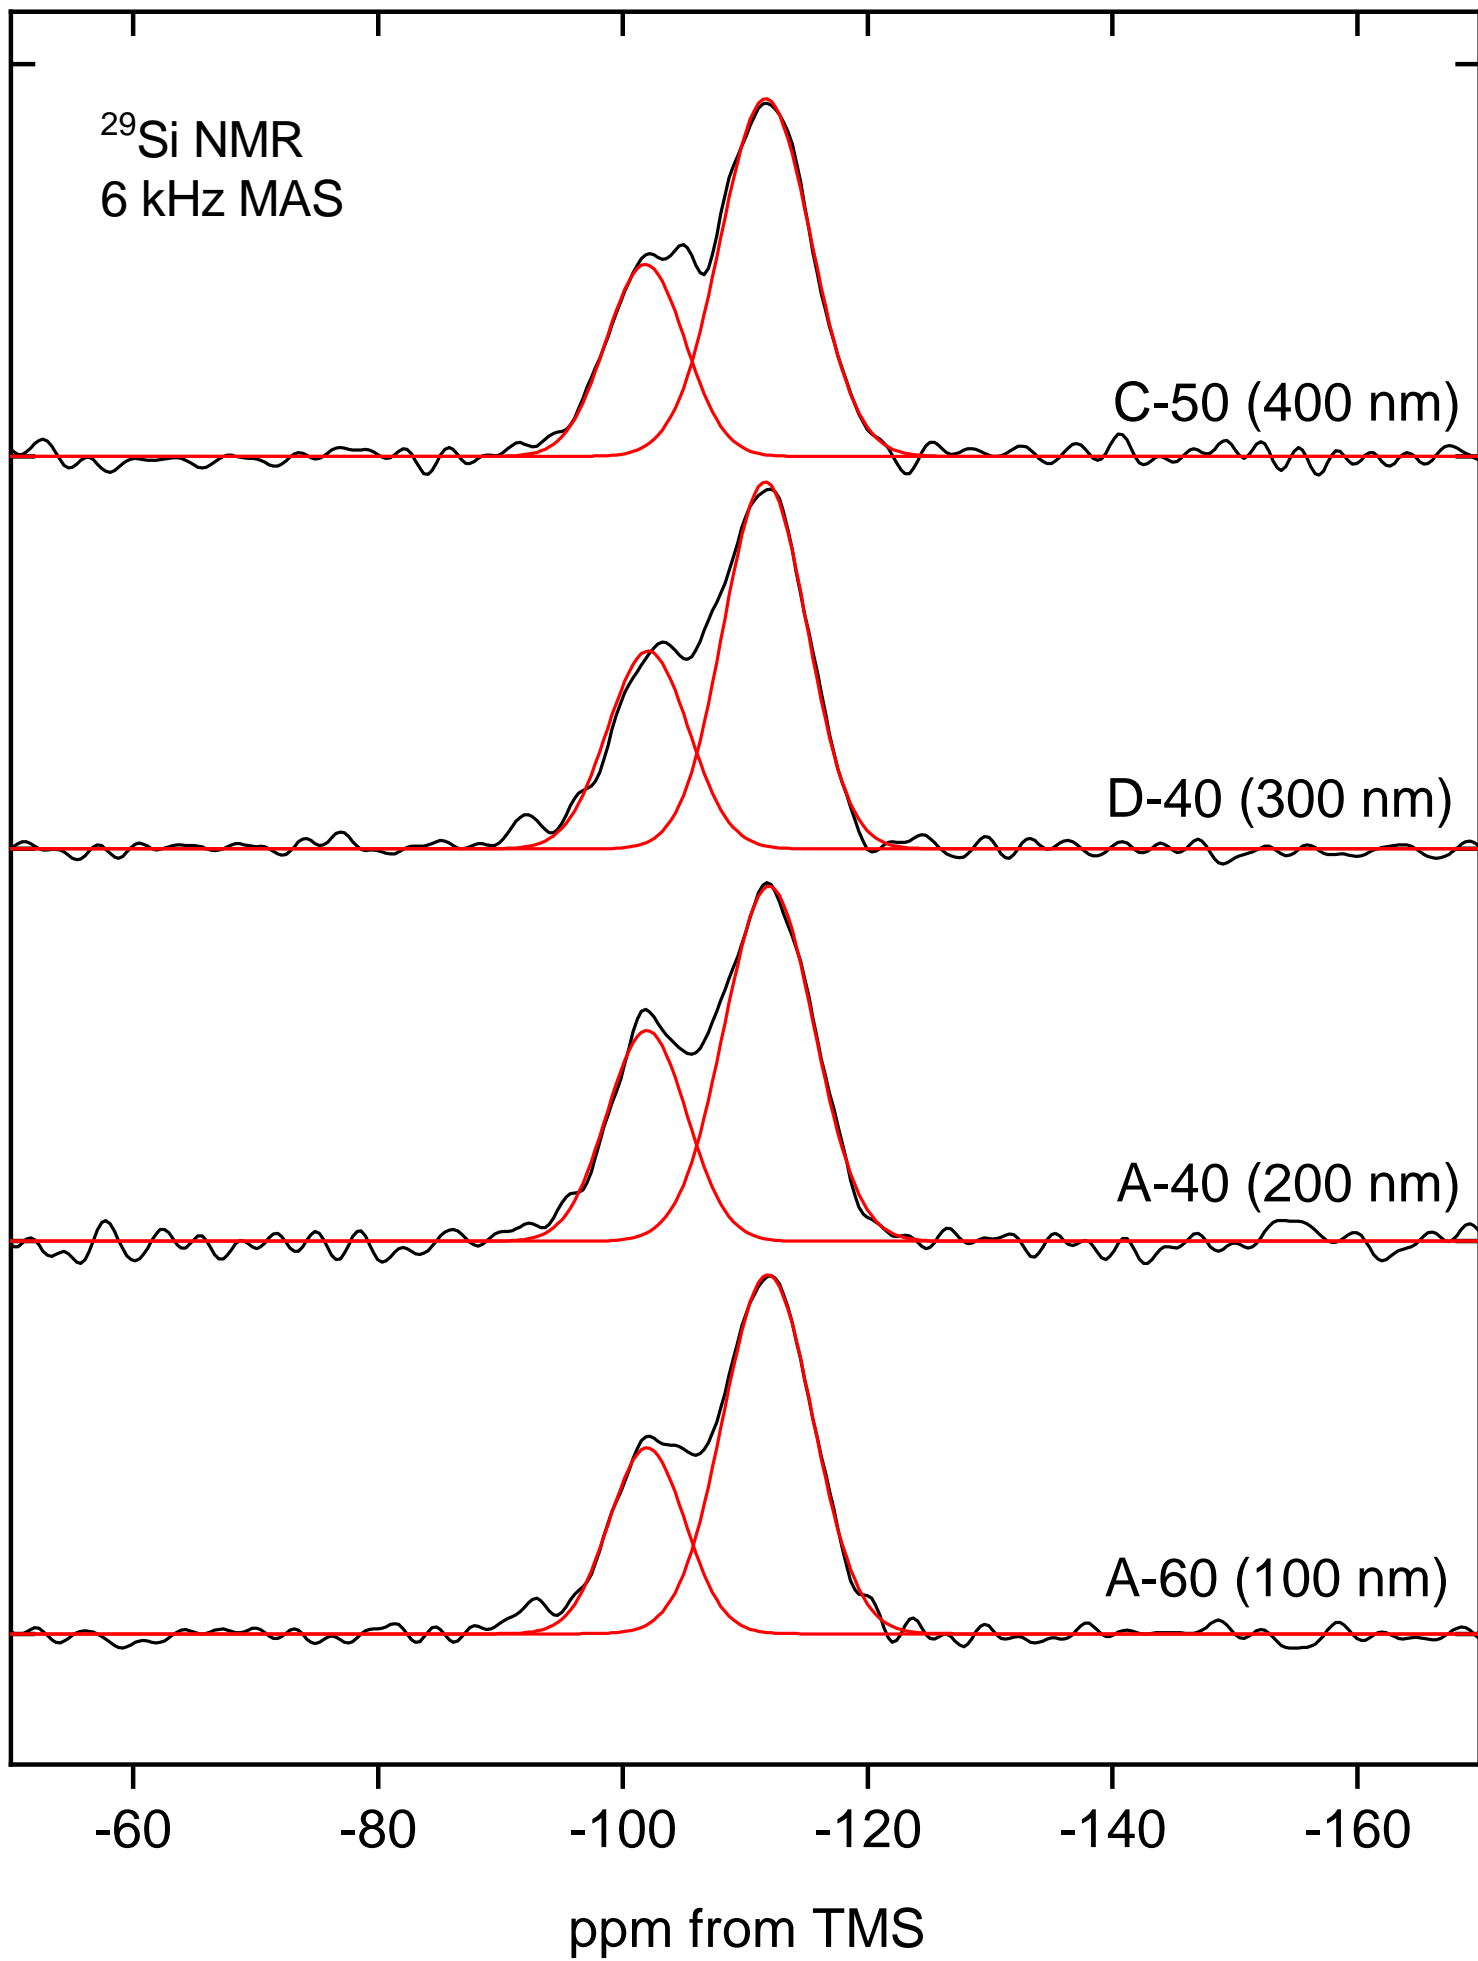

Supplement: s1 [file s1]

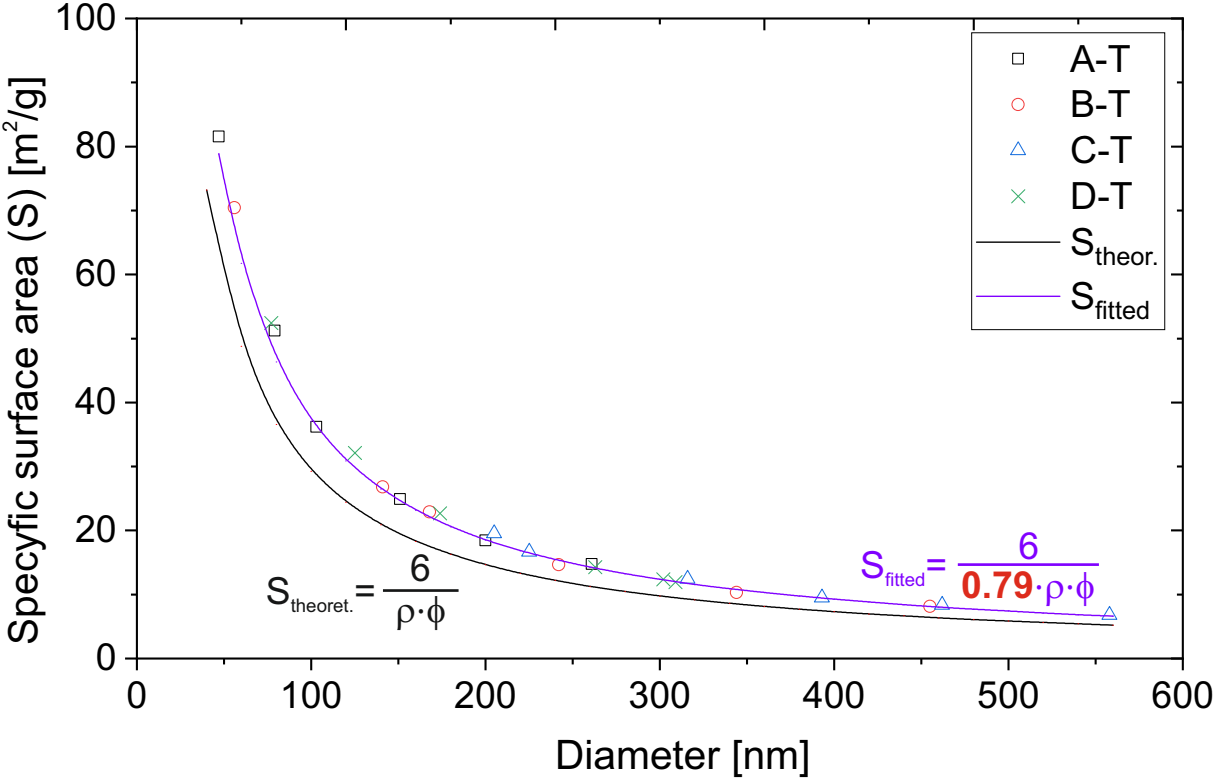

Supplement: s1 [file s1]

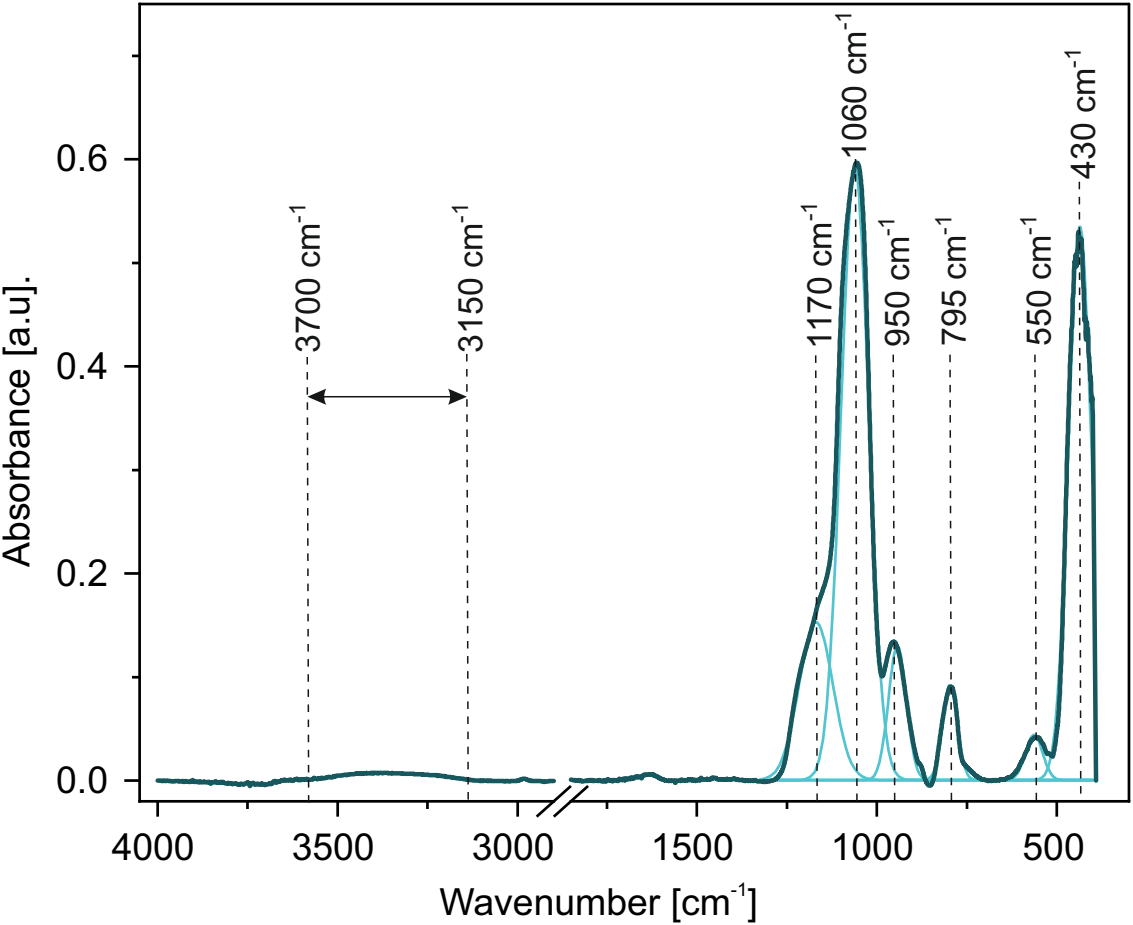

Supplement: s1 [file s1]

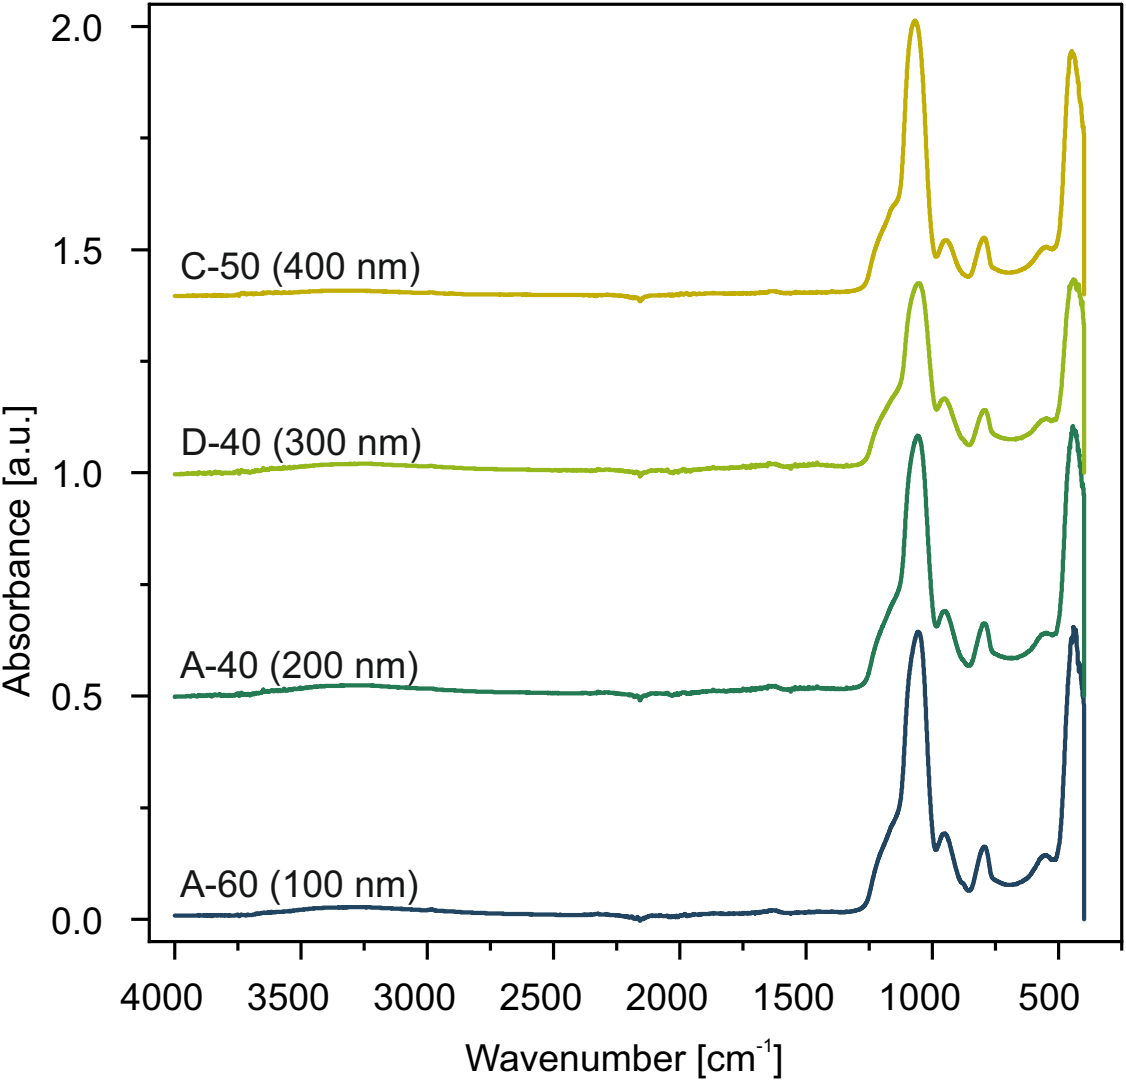

Supplement: s1 [file s1]
